# Supplementary material for: Using whole genome sequencing to study American foulbrood epidemiology in honeybees
Source: PLoS One. 2017 Nov 15;12(11):e0187924. doi: 10.1371/journal.pone.0187924 (PMC5687730; doi:10.1371/journal.pone.0187924)
Supplement: S2 Table — The targets were extracted from P. larvae DSM 25430 (ERIC II strain). (XLS) [file pone.0187924.s002.xls]

## Sheet: ERIC II gene targets
S2 Table. Core genome-MLST targets for ERIC II strains. The targets were extracted from P. larvae DSM 25430 (ERIC II strain).
Target	Gene	Product	Starting position in DSM 25430	Length
ERIC2_c00010	dnaA	chromosomal replication initiator protein DnaA	94	1359
ERIC2_c00020	dnaN	DNA polymerase III subunit beta	1678	1143
ERIC2_c00030		RNA binding-like protein	2838	216
ERIC2_c00040	recF	DNA replication and repair protein RecF	3056	1140
ERIC2_c00050		hypothetical protein	4203	249
ERIC2_c00060	gyrB	DNA gyrase subunit B	4489	1911
ERIC2_c00070	gyrA	DNA gyrase subunit A	6435	2487
ERIC2_c00120	guaB	inosine-5'-monophosphate dehydrogenase GuaB	15609	1458
ERIC2_c00130	dacA	D-alanyl-D-alanine carboxypeptidase DacA	17174	1299
ERIC2_c00140	pdxS	pyridoxal biosynthesis lyase PdxS	18596	882
ERIC2_c00150	pdxT	glutamine amidotransferase subunit PdxT	19504	582
ERIC2_c00160	serS1	seryl-tRNA ligase SerS	20194	1281
ERIC2_c00180		hypothetical protein	21781	348
ERIC2_c00181		hypothetical protein	22141	150
ERIC2_c00182		hypothetical protein	22331	147
ERIC2_c00190		hypothetical protein	22773	1236
ERIC2_c00200		hypothetical protein	24065	495
ERIC2_c00210	sigW1	RNA polymerase sigma factor SigW	24556	543
ERIC2_c00240		hypothetical protein	25749	480
ERIC2_c00250		hypothetical protein	26256	438
ERIC2_c00260	tadA	tRNA-specific adenosine deaminase TadA	26751	474
ERIC2_c00270		hypothetical protein	27499	201
ERIC2_c00271		hypothetical protein	27820	195
ERIC2_c00280		hypothetical protein	28161	318
ERIC2_c00300		hypothetical protein	30015	315
ERIC2_c00320	engD	GTP-dependent nucleic acid-binding protein EngD	31909	1101
ERIC2_c00330	prfA	peptide chain release factor 1	33061	1074
ERIC2_c00340	prmC	release factor glutamine methyltransferase PrmC	34139	882
ERIC2_c00350	spoIIR	stage II sporulation protein R	35111	699
ERIC2_c00360	ywlC	putative tRNA threonylcarbamoyladenosine biosynthesis protein YwlC	35825	1059
ERIC2_c00370		hypothetical protein	36922	585
ERIC2_c00380		protein-tyrosine-phosphatase-like protein	37750	594
ERIC2_c00381		hypothetical protein	38504	153
ERIC2_c00390	ywlF	putative sugar phosphate isomerase YwlF	38702	462
ERIC2_c00400		transcriptional regulator	39256	576
ERIC2_c00410	glyA	pyridoxal-phosphate-dependent serine hydroxymethyltransferase GlyA	39885	1248
ERIC2_c00420	upp	uracil phosphoribosyltransferase Upp	41398	630
ERIC2_c00430	mnaA	UDP-N-acetylglucosamine 2-epimerase MnaA	42044	1143
ERIC2_c00450		ATP synthase-like protein	43616	372
ERIC2_c00460	atpB	ATP synthase subunit a	44015	780
ERIC2_c00470		hypothetical protein	44899	213
ERIC2_c00490	atpH	ATP synthase subunit delta	45697	552
ERIC2_c00500	atpA	ATP synthase subunit alpha	46265	1518
ERIC2_c00510	atpG	ATP synthase gamma chain AtpG	47983	858
ERIC2_c00520	atpD	ATP synthase subunit beta	48944	1407
ERIC2_c00530	atpC	ATP synthase epsilon chain AtpC	50390	417
ERIC2_c00540		RNA polymerase sigma factor SigY-like protein	50867	420
ERIC2_c00541		hypothetical protein	51395	90
ERIC2_c00550		hypothetical protein	51848	213
ERIC2_c00570	nuoB	NADH-quinone oxidoreductase subunit B	52783	519
ERIC2_c00580	nuoC	NADH-quinone oxidoreductase subunit C	53298	750
ERIC2_c00590	nuoD	NADH-quinone oxidoreductase subunit D	54051	1098
ERIC2_c00600	nuoH	NADH-quinone oxidoreductase subunit H	55148	1008
ERIC2_c00620	ndhG	NAD(P)H-quinone oxidoreductase chain 6	56648	522
ERIC2_c00630	nuoK	NADH-quinone oxidoreductase subunit K	57173	312
ERIC2_c00640	ndhF	NAD(P)H-quinone oxidoreductase chain 5	57503	1878
ERIC2_c00660	nuoN	NADH-quinone oxidoreductase subunit N	60999	1512
ERIC2_c00670		thermophilic serine proteinase	62668	2529
ERIC2_c00680		hypothetical protein	65210	255
ERIC2_c00690	murA1	UDP-N-acetylglucosamine 1-carboxyvinyltransferase	65655	1323
ERIC2_c00700	spoIID	stage II sporulation protein D	67198	1077
ERIC2_c00710	spoIIQ	stage II sporulation protein Q	68341	732
ERIC2_c00720	spoIIID	stage III sporulation protein D	69258	327
ERIC2_c00730	mbl	MreB-like protein Mbl	69751	1002
ERIC2_c00740	flhO	flagellar hook-basal body complex protein FlhO	70766	894
ERIC2_c00750	flgG1	flagellar basal-body rod protein FlgG	71701	828
ERIC2_c00760		hypothetical protein	72528	561
ERIC2_c00770		CDP-diacylglycerol-glycerol-3-phosphate 3-phosphatidyltransferase-like protein	73182	525
ERIC2_c00780	fabZ1	(3R)-hydroxymyristoyl-[acyl-carrier-protein] dehydratase FabZ	73874	432
ERIC2_c00790	pgcA	phosphoglucomutase PgcA	74347	1695
ERIC2_c00800		hypothetical protein	76094	2097
ERIC2_c00810	csaB	polysaccharide pyruvyl transferase CsaB	78193	1080
ERIC2_c00811		hypothetical protein	79320	93
ERIC2_c00820	tagO1	putative undecaprenyl-phosphate N-acetylglucosaminyl 1-phosphate transferase TagO	79546	1101
ERIC2_c00830		S-layer protein	80827	3843
ERIC2_c00840		S-layer protein	85070	3024
ERIC2_c00850	sasPA	small, acid-soluble spore protein A	88340	279
ERIC2_c00860	metK	S-adenosylmethionine synthase MetK	88833	1206
ERIC2_c00870		hypothetical protein	90248	246
ERIC2_c00880		hypothetical protein	90583	321
ERIC2_c00890		hypothetical protein	90929	240
ERIC2_c00900	degS	sensor protein DegS	91233	1188
ERIC2_c00910	degU	transcriptional regulatory protein DegU	92425	693
ERIC2_c00920		hypothetical protein	93169	402
ERIC2_c00930	comFA	ComF operon protein 1	93619	1977
ERIC2_c00940		DNA transport apparatus-associated-like protein	95592	786
ERIC2_c00950		putative DNA-binding protein	96474	1359
ERIC2_c00960	bacT	thioesterase BacT	98253	744
ERIC2_c00970	nosD	copper-binding periplasmic protein NosD	99298	1344
ERIC2_c00980		putative lipoprotein	100638	660
ERIC2_c00990		hypothetical protein	101327	822
ERIC2_c01000		ABC transporter-like protein	102159	750
ERIC2_c01010		hypothetical protein	102905	411
ERIC2_c01020		flagella formation-associated protein	103460	480
ERIC2_c01030		anti-sigma-28 factor, FlgM family	104048	261
ERIC2_c01040	flgN	putative FlgN protein	104341	504
ERIC2_c01050	flgK	flagellar hook-associated protein 1	104858	1560
ERIC2_c01060	flgL	flagellar hook-associated protein 3	106437	900
ERIC2_c01070		hypothetical protein	107347	561
ERIC2_c01080	fliW	flagellar assembly factor FliW	108009	462
ERIC2_c01090	csrA	putative carbon storage regulator protein	108477	282
ERIC2_c01100	hag	flagellin	108833	858
ERIC2_c01110		flagellar hook-associated protein	110217	1518
ERIC2_c01120	fliS	flagellar protein FliS	111748	399
ERIC2_c01130	fliT	flagellar protein FliT	112199	294
ERIC2_c01140	cspC	cold shock-like protein CspC	112831	207
ERIC2_c01150		hypothetical protein	113360	549
ERIC2_c01170		hypothetical protein	115974	297
ERIC2_c01190	secA	protein translocase subunit SecA	117026	2508
ERIC2_c01200	prfB	peptide chain release factor 2	119689	1005
ERIC2_c01210		hypothetical protein	120760	882
ERIC2_c01220	argC	N-acetyl-gamma-glutamyl-phosphate reductase ArgC	121850	1083
ERIC2_c01230	argJ	arginine biosynthesis bifunctional protein ArgJ	123006	1227
ERIC2_c01240	argB	acetylglutamate kinase ArgB	124290	795
ERIC2_c01250	argD1	acetylornithine aminotransferase ArgD	125117	1221
ERIC2_c01260	argF	ornithine carbamoyltransferase ArgF	126356	960
ERIC2_c01270	argG	argininosuccinate synthase ArgG	127341	1227
ERIC2_c01280	argH	argininosuccinate lyase ArgH	128655	1410
ERIC2_c01290		putative vancomycin resistance protein	130239	1491
ERIC2_c01300	ftsE	cell division ATP-binding protein FtsE	132117	678
ERIC2_c01310	ftsX	cell division protein FtsX	132799	906
ERIC2_c01320		cell wall endopeptidase, family M23/M37	133857	1272
ERIC2_c01330	ctpB	carboxy-terminal processing protease CtpB	135217	1446
ERIC2_c01340	minJ	cell division topological determinant MinJ	136807	1281
ERIC2_c01350		hypothetical protein	138362	315
ERIC2_c01360		putative flagellar motor protein	138736	669
ERIC2_c01370	motA	motility protein A	139484	798
ERIC2_c01380	uvrB	UvrABC system protein B	140533	1995
ERIC2_c01390	uvrA	UvrABC system protein A	142713	2883
ERIC2_c01400		hypothetical protein	145904	399
ERIC2_c01410	nirA	ferredoxin--nitrite reductase NirA	146394	1617
ERIC2_c01420		AP endonuclease, family 2	148645	969
ERIC2_c01470		hypothetical protein	154447	330
ERIC2_c01490	purA	adenylosuccinate ligase PurA	156353	1287
ERIC2_c01500	dnaC	replicative DNA helicase DnaC	157800	1362
ERIC2_c01510	rplI	50S ribosomal protein L9	159186	447
ERIC2_c01520		hypothetical protein	159629	1956
ERIC2_c01530		hypothetical protein	161602	972
ERIC2_c01540		hypothetical protein	162924	327
ERIC2_c01570		hypothetical protein	165318	690
ERIC2_c01580		peptidase, M23 family	166309	1248
ERIC2_c01590	walR	transcriptional regulatory protein WalR	167662	849
ERIC2_c01600	yycG	sensor histidine kinase YycG	168511	1827
ERIC2_c01610		hypothetical protein	170334	1314
ERIC2_c01620		hypothetical protein	171680	768
ERIC2_c01630	yycJ	putative metallo-hydrolase YycJ	172494	807
ERIC2_c01640	yyxA	putative serine protease YyxA	173640	1215
ERIC2_c01650		hypothetical protein	174911	168
ERIC2_c01670		hypothetical protein	175571	285
ERIC2_c01680		transcriptional regulator-like protein	176348	516
ERIC2_c01690	yteT	putative oxidoreductase YteT	177036	1257
ERIC2_c01700	rlmH	ribosomal RNA large subunit methyltransferase H	179196	480
ERIC2_c01710		DNA integration/recombination/inversion protein	179678	660
ERIC2_c01711		hypothetical protein	180491	135
ERIC2_c01730	ugtP1	processive diacylglycerol glucosyltransferase UgtP	182883	1212
ERIC2_c01740	ydgK	putative MFS-type transporter YdgK	184322	384
ERIC2_c01750	lrgB	antiholin-like protein LrgB	184963	699
ERIC2_c01760	lrgA	antiholin-like protein LrgA	185719	465
ERIC2_c01770	lytT	sensory transduction protein LytT	186316	738
ERIC2_c01780	lytS	sensor protein LytS	187055	1749
ERIC2_c01790		hypothetical protein	188823	570
ERIC2_c01800	lacD	tagatose 1,6-diphosphate aldolase	189499	1023
ERIC2_c01820		transporter, EamA family	191991	501
ERIC2_c01830	yajO	putative oxidoreductase YajO	192824	978
ERIC2_c01840		hypothetical protein	193903	183
ERIC2_c01850	pepT	peptidase T	194335	1311
ERIC2_c01860		hypothetical protein	195729	438
ERIC2_c01870		methyltransferase-like protein	196476	1281
ERIC2_c01880	rmlC	dTDP-4-dehydrorhamnose 3,5-epimerase	197753	540
ERIC2_c01890		NAD-dependent epimerase/dehydratase family protein	198289	924
ERIC2_c01910		cephalosporin hydroxylase family protein	200404	777
ERIC2_c01920		hypothetical protein	201199	723
ERIC2_c01930		hypothetical protein	201949	657
ERIC2_c01940	rfbF	glucose-1-phosphate cytidylyltransferase RfbF	202655	771
ERIC2_c01950	rfbG	CDP-glucose 4,6-dehydratase	203431	1086
ERIC2_c01960	wscE	putative glycosyltransferase WscE	204580	972
ERIC2_c01970		hypothetical protein	205589	843
ERIC2_c01980		hypothetical protein	206493	858
ERIC2_c01990		hypothetical protein	207399	681
ERIC2_c02000		hypothetical protein	208094	825
ERIC2_c02010		hypothetical protein	208979	768
ERIC2_c02020		glycosyl transferase family 2	209971	1134
ERIC2_c02030		glycosyltransferase, group 1 family protein	211109	1122
ERIC2_c02040		phage-related pre-neck appendage-like protein	212313	1515
ERIC2_c02050		glycosyltransferase-like protein	214023	1134
ERIC2_c02080		ABC-2 family transporter protein	217370	1161
ERIC2_c02090		ABC-type multidrug transport system, ATPase component	218591	837
ERIC2_c02100	pcrB	heptaprenylglyceryl phosphate synthase PcrB	219784	699
ERIC2_c02110	pcrA	ATP-dependent DNA helicase PcrA	220631	2331
ERIC2_c02120	ligA	DNA ligase LigA	223050	2022
ERIC2_c02221		hypothetical protein	231194	318
ERIC2_c02230		putative glucose dehydrogenase	231599	1578
ERIC2_c02250		hypothetical protein	233771	474
ERIC2_c02260	tagO2	putative undecaprenyl-phosphate N-acetylglucosaminyl 1-phosphate transferase TagO	234352	906
ERIC2_c02270		lipoyl synthase-like protein	235339	1107
ERIC2_c02280	msmX1	maltodextrin import ATP-binding protein MsmX	236544	1122
ERIC2_c02300	hprK	HPr kinase/phosphorylase HprK	239188	936
ERIC2_c02310	lgt1	prolipoprotein diacylglyceryl transferase Lgt	240162	1008
ERIC2_c02320	ppaX	pyrophosphatase PpaX	241166	663
ERIC2_c02331		hypothetical protein	242335	189
ERIC2_c02340	hisZ	ATP phosphoribosyltransferase regulatory subunit HisZ	242650	1227
ERIC2_c02360	hisD	histidinol dehydrogenase HisD	244527	1287
ERIC2_c02370	hisB	imidazoleglycerol-phosphate dehydratase HisB	245810	600
ERIC2_c02380	hisH	imidazole glycerol phosphate synthase subunit HisH	246413	606
ERIC2_c02390	hisA	1-(5-phosphoribosyl)-5-[(5- phosphoribosylamino)methylideneamino] imidazole-4-carboxamide isomerase HisA	247147	735
ERIC2_c02400	hisF	imidazole glycerol phosphate synthase subunit HisF	247947	780
ERIC2_c02410	hisI	histidine biosynthesis bifunctional protein HisIE	248723	729
ERIC2_c02420	hisK	putative histidinol-phosphatase HisK	249521	807
ERIC2_c02430		ribose-phosphate pyrophosphokinase	250517	951
ERIC2_c02440		tetratricopeptide repeat protein	251548	1767
ERIC2_c02450	trxB1	thioredoxin reductase TrxB	253331	948
ERIC2_c02460		putative glucokinase	254467	951
ERIC2_c02470		hypothetical protein	255478	882
ERIC2_c02480		hypothetical protein	256371	978
ERIC2_c02490	whiA	putative sporulation transcription regulator WhiA	257354	927
ERIC2_c02500	crh	HPr-like protein Crh	258495	249
ERIC2_c02510		hypothetical protein	259113	654
ERIC2_c02520		integral membrane protein	259770	420
ERIC2_c02530	natA1	ATP-binding transport protein NatA	260186	846
ERIC2_c02540		hypothetical protein	261028	1692
ERIC2_c02560	clpP2	ATP-dependent Clp protease proteolytic subunit ClpP	264582	582
ERIC2_c02580	cggR	central glycolytic genes regulator	265699	1029
ERIC2_c02590	gap	glyceraldehyde-3-phosphate dehydrogenase Gap	266778	1011
ERIC2_c02600	pgk	phosphoglycerate kinase Pgk	267927	1182
ERIC2_c02610	tpiA	triosephosphate isomerase TpiA	269130	753
ERIC2_c02620	gpmI	2,3-bisphosphoglycerate-independent phosphoglycerate mutase	269884	1539
ERIC2_c02630	eno	enolase Eno	271579	1293
ERIC2_c02640		hypothetical protein	272940	714
ERIC2_c02650		hypothetical protein	273786	237
ERIC2_c02670	smpB	SsrA-binding protein SmpB	277398	480
ERIC2_c02680		hypothetical protein	278826	441
ERIC2_c02690		hypothetical protein	279440	417
ERIC2_c02700		hypothetical protein	280632	270
ERIC2_c02710		hypothetical protein	281122	384
ERIC2_c02730		hypothetical protein	283336	258
ERIC2_c02740		hypothetical protein	283689	177
ERIC2_c02750		hypothetical protein	284085	249
ERIC2_c02770	catE	catechol-2,3-dioxygenase	286857	870
ERIC2_c02780	ywnE	putative cardiolipin synthase	287814	1563
ERIC2_c02800		hypothetical protein	290956	396
ERIC2_c02810	dmpM	O-demethylpuromycin-O-methyltransferase DmpM	291630	1041
ERIC2_c02820	pbpF1	penicillin-binding protein 1F	292797	840
ERIC2_c02830	rfbM	mannose-1-phosphate guanylyltransferase RfbM	293943	1002
ERIC2_c02840	gmd	putative GDP-mannose 4,6-dehydratase	294992	954
ERIC2_c02850		glycosyltransferase	295946	1053
ERIC2_c02860		putative cold-inducible protein	297131	207
ERIC2_c02870	cspLB	cold shock-like protein CspLB	297433	231
ERIC2_c02900	kduI	4-deoxy-L-threo-5-hexosulose-uronate ketol-isomerase KduI	298653	663
ERIC2_c02910	yulB	putative HTH-type transcriptional regulator YulB	299354	765
ERIC2_c02920	kduD	2-dehydro-3-deoxy-D-gluconate 5-dehydrogenase KduD	300147	756
ERIC2_c02930	pbuX	xanthine permease PbuX	300980	1305
ERIC2_c02950		glycosyl hydrolase, family 5	303383	3138
ERIC2_c02960	ddh	meso-diaminopimelate D-dehydrogenase Ddh	306919	573
ERIC2_c03000		putative ABC transporter ATP-binding protein	310218	741
ERIC2_c03020		hypothetical protein	312980	243
ERIC2_c03040	yjcD	putative ATP-dependent DNA helicase YjcD	313957	2778
ERIC2_c03050	thiN	thiamine pyrophosphokinase ThiN	316867	642
ERIC2_c03060		hypothetical protein	317635	213
ERIC2_c03070		Two-component sensor histidine kinase-like protein	318053	1917
ERIC2_c03090		hypothetical protein	321047	471
ERIC2_c03100		hypothetical protein	321628	204
ERIC2_c03111		hypothetical protein	324904	111
ERIC2_c03120	kdpA	potassium-transporting ATPase A chain KdpA	325117	1680
ERIC2_c03130	kdpB	potassium-transporting ATPase B chain KdpB	326819	2031
ERIC2_c03140	kdpC	potassium-transporting ATPase C chain KdpC	328884	621
ERIC2_c03150	kdpD	sensor protein KdpD	329522	2310
ERIC2_c03160		putative taurine ABC transporter, ATP-binding protein	332370	396
ERIC2_c03161		hypothetical protein	332765	222
ERIC2_c03170		putative transporter protein	332983	483
ERIC2_c03180		hypothetical protein	333660	507
ERIC2_c03190	ugtP	processive diacylglycerol glucosyltransferase UgtP	334224	1149
ERIC2_c03200	tdk	thymidine kinase Tdk	335465	549
ERIC2_c03210		hypothetical protein	336287	381
ERIC2_c03220		transcriptional regulator-like protein	336801	660
ERIC2_c03240		hypothetical protein	338487	744
ERIC2_c03260	cls	cardiolipin synthase Cls	340727	1485
ERIC2_c03270		DNA polymerase LigD	342225	906
ERIC2_c03280		ATP-dependent DNA ligase-like protein	343152	948
ERIC2_c03290	ykoV	putative DNA repair protein YkoV	344101	843
ERIC2_c03320		hypothetical protein	345682	144
ERIC2_c03330	araP	L-arabinose transport system permease protein AraP	345877	939
ERIC2_c03340	araQ	L-arabinose transport system permease protein AraQ	346828	834
ERIC2_c03350	msmX2	maltodextrin import ATP-binding protein MsmX	347698	1152
ERIC2_c03360		hypothetical protein	348927	639
ERIC2_c03370		hypothetical protein	349690	147
ERIC2_c03380		hypothetical protein	349856	924
ERIC2_c03390	anmK	anhydro-N-acetylmuramic acid kinase AnmK	350783	1188
ERIC2_c03400		fructose amino acid-binding lipoprotein-like protein	352090	1359
ERIC2_c03410		hypothetical protein	353449	180
ERIC2_c03420		FAD dependent oxidoreductase	354075	1434
ERIC2_c03430		acetyltransferase, GNAT family	355637	1134
ERIC2_c03440	manR	putative transcriptional regulator ManR	357094	1938
ERIC2_c03460		HPr-like protein	360992	258
ERIC2_c03470		PTS system, fructose subfamily, IIA component	361397	453
ERIC2_c03480		PTS system, fructose-specific, IIB component/PTS system, fructose subfamily, IIC component	361868	1440
ERIC2_c03490	ydiB	ATP-binding protein YdiB	363713	480
ERIC2_c03500		chaperone-like protein/protease-like protein	364225	843
ERIC2_c03510	rimI	putative ribosomal-protein-alanine acetyltransferase RimI	365074	519
ERIC2_c03520	gcp	putative tRNA threonylcarbamoyladenosine biosynthesis protein Gcp	365614	1020
ERIC2_c03550		hypothetical protein	368345	279
ERIC2_c03551		hypothetical protein	368646	114
ERIC2_c03560		hypothetical protein	368974	150
ERIC2_c03570		peptidase U61 LD-carboxypeptidase A	369312	1101
ERIC2_c03580	ydiF	putative ABC transporter ATP-binding protein YdiF	370508	1932
ERIC2_c03590		5-formyltetrahydrofolate cyclo-ligase-like protein	372714	636
ERIC2_c03600	moaC	molybdenum cofactor biosynthesis protein C	373408	453
ERIC2_c03610	mog	molybdopterin adenylyltransferase Mog	373879	492
ERIC2_c03620		molybdene to molybdopterin ligation enzyme-like protein	374367	1011
ERIC2_c03630		twin-arginine translocation protein, TatA/E family subunit	375409	264
ERIC2_c03640	tatC	Sec-independent protein translocase protein TatC	375717	762
ERIC2_c03650	groS	10 kDa chaperonin	376800	282
ERIC2_c03660	groL	60 kDa chaperonin	377171	1629
ERIC2_c03670		integrase	378888	438
ERIC2_c03680		hypothetical protein	379443	288
ERIC2_c03710		hypothetical protein	381083	195
ERIC2_c03720		hypothetical protein	381327	321
ERIC2_c03740	yndE1	spore germination protein YndE	383596	1101
ERIC2_c03770		toxin-like protein	387020	1251
ERIC2_c03780		toxin-like protein	388342	1482
ERIC2_c03790		hypothetical protein	389883	156
ERIC2_c03810		amino acid antiporter	392134	1335
ERIC2_c03820		decarboxylase	393480	1869
ERIC2_c03830	nhaC1	Na(+)/H(+) antiporter NhaC	395419	1389
ERIC2_c03840	tyrS	tyrosine--tRNA ligase	397246	1374
ERIC2_c03850		hypothetical protein	398651	702
ERIC2_c03870		putative transporter	401780	1449
ERIC2_c03880		decarboxylase	403265	1884
ERIC2_c03890	pdxK1	pyridoxine kinase PdxK	405258	708
ERIC2_c03900		putative tyrosine permease, NhaC family	406137	1413
ERIC2_c03910		TrpR like protein, YerC/YecD	407836	297
ERIC2_c03920		hypothetical protein	408460	633
ERIC2_c03930		hypothetical protein	409283	855
ERIC2_c03960	rfbC	dTDP-4-dehydrorhamnose 3,5-epimerase	411604	552
ERIC2_c03970	rfbB2	dTDP-glucose 4,6-dehydratase	412152	960
ERIC2_c03980	spsK	spore coat polysaccharide biosynthesis protein SpsK	413108	855
ERIC2_c03990		hypothetical protein	414219	294
ERIC2_c04000		hypothetical protein	414563	222
ERIC2_c04010		transporter-like protein	415075	366
ERIC2_c04030		hypothetical protein	417075	153
ERIC2_c04040		transposase	417273	327
ERIC2_c04060		hypothetical protein	418026	777
ERIC2_c04070		hypothetical protein	419195	195
ERIC2_c04080		hypothetical protein	419394	159
ERIC2_c04100		hypothetical protein	421745	267
ERIC2_c04110		hypothetical protein	422165	882
ERIC2_c04120		CRISPR-associated RAMP Cmr1 family protein	423069	933
ERIC2_c04130		CRISPR-associated RAMP Crm2 family protein	424001	1674
ERIC2_c04140		CRISPR-associated protein, Cmr3 family	425674	1125
ERIC2_c04160		CRISPR-associated RAMP protein, Cmr4 family	427111	597
ERIC2_c04170		CRISPR-associated protein, Cmr5 family	427739	357
ERIC2_c04180		CRISPR-associated RAMP Cmr6 family protein	428169	759
ERIC2_c04240		ABC-transporter ATP-binding protein	431770	672
ERIC2_c04241		hypothetical protein	432438	171
ERIC2_c04250		hypothetical protein	432628	294
ERIC2_c04270		hypothetical protein	434133	183
ERIC2_c04290	ydcC	sporulation protein YdcC	436282	1257
ERIC2_c04300	alr	alanine racemase Alr	437706	1188
ERIC2_c04310		putative transcriptional regulator, CopG family	439128	282
ERIC2_c04320	ndoA	mRNA interferase NdoA	439413	351
ERIC2_c04330		Tex-like protein N-terminal domain protein	439851	2289
ERIC2_c04340		ECF subfamily RNA polymerase sigma-24 factor	442341	549
ERIC2_c04350		hypothetical protein	443304	459
ERIC2_c04360		hypothetical protein	443795	138
ERIC2_c04370		hypothetical protein	444354	228
ERIC2_c04380	epr	minor extracellular protease Epr	444837	1005
ERIC2_c04390		hypothetical protein	445871	165
ERIC2_c04410		hypothetical protein	446613	306
ERIC2_c04430		SprT-like protein	447068	471
ERIC2_c04490		phage integrase-like protein	448259	738
ERIC2_c04491		hypothetical protein	449027	201
ERIC2_c04500		LexA repressor-like protein	449240	609
ERIC2_c04511		hypothetical protein	451143	258
ERIC2_c04560		hypothetical protein	454567	465
ERIC2_c04570		hypothetical protein	455028	306
ERIC2_c04580		hypothetical protein	455344	162
ERIC2_c04590	skfF	putative bacteriocin-skfA transport system permease protein SkfF	455502	1482
ERIC2_c04640		hypothetical protein	460615	1215
ERIC2_c04650		hypothetical protein	461903	186
ERIC2_c04660		hypothetical protein	462463	405
ERIC2_c04680		antibiotic biosynthesis monooxygenase	463653	327
ERIC2_c04690		hypothetical protein	464118	303
ERIC2_c04700		methyl-accepting chemotaxis protein signaling domain protein	465060	1998
ERIC2_c04720		hypothetical protein	468711	615
ERIC2_c04740		hypothetical protein	471150	213
ERIC2_c04750		transcriptional regulator-like protein	471550	456
ERIC2_c04760	ydgH	putative membrane protein YdgH	472002	3168
ERIC2_c04770	def2	peptide deformylase 2	475368	588
ERIC2_c04780	msrAB	peptide methionine sulfoxide reductase MsrA/MsrB	476010	969
ERIC2_c04790		sodium/hydrogen exchanger family protein	477262	612
ERIC2_c04800		major facilitator superfamily MFS_1 protein	478331	1065
ERIC2_c04810		transcriptional regulator, BadM/Rrf2 family	479956	399
ERIC2_c04830		transcriptional regulator, GntR family	480586	726
ERIC2_c04840	agaV	N-acetylgalactosamine-specific phosphotransferase enzyme IIB component 2	481496	498
ERIC2_c04850	agaW	putative N-acetylgalactosamine permease IIC component 2	482012	768
ERIC2_c04860	agaD	N-acetylgalactosamine permease IID component AgaD	482928	714
ERIC2_c04870		PTS system mannose-specific component IIAB-like protein	483659	423
ERIC2_c04880		amino acid adenylation protein	484146	3720
ERIC2_c04890		methyl-accepting chemotaxis protein	487926	1758
ERIC2_c04900		hypothetical protein	490129	324
ERIC2_c04910		hypothetical protein	490466	288
ERIC2_c04920		polysaccharide biosynthesis protein	490934	1635
ERIC2_c04940		acetyltransferase	493044	1278
ERIC2_c04950	apbE	thiamine biosynthesis lipoprotein ApbE	494718	1068
ERIC2_c04960		hypothetical protein	496034	432
ERIC2_c04970		heptaprenyl diphosphate synthase related protein	496470	543
ERIC2_c04980		energy-coupling factor transporter ATP-binding protein	497048	834
ERIC2_c04990		energy-coupling factor transporter ATP-binding protein	498004	720
ERIC2_c05000	ecfT	energy-coupling factor transporter transmembrane protein EcfT	498740	804
ERIC2_c05010		peptidase U32	499676	1923
ERIC2_c05020		aminotransferase class-III	501634	1275
ERIC2_c05030		3-octaprenyl-4hydroxybenzoate decarboxylase	502922	1440
ERIC2_c05050		Two-component sensor histidine kinase YkoG-like protein	505565	330
ERIC2_c05060		hypothetical protein	505904	267
ERIC2_c05070		Two-component response regulator YkoH-like protein	506206	393
ERIC2_c05100		ABC transporter, permease protein	508775	1848
ERIC2_c05140		hypothetical protein	513371	204
ERIC2_c05150		peptidoglycan-N-acetylmuramate O-acetyltransferase	513913	1950
ERIC2_c05160		hypothetical protein	515867	516
ERIC2_c05190		hypothetical protein	518111	459
ERIC2_c05200		putative beta-lactamase	518642	600
ERIC2_c05210		hypothetical protein	519630	897
ERIC2_c05220	ndh	NADH dehydrogenase Ndh	520672	1878
ERIC2_c05230		hypothetical protein	522675	450
ERIC2_c05240	hepT1	heptaprenyl diphosphate synthase component 2	523137	981
ERIC2_c05241		hypothetical protein	524114	114
ERIC2_c05250		hypothetical protein	524427	237
ERIC2_c05260		transposase	524844	768
ERIC2_c05300		toxin-like protein	528439	450
ERIC2_c05310		lethal factor domain protein	528972	264
ERIC2_c05340		transposase	531072	150
ERIC2_c05350		hypothetical protein	531298	225
ERIC2_c05360	argS2	arginine--tRNA ligase ArgS	531752	1704
ERIC2_c05370	queC	7-cyano-7-deazaguanine synthase QueC	534004	672
ERIC2_c05390	queE	7-carboxy-7-deazaguanine synthase QueE	535150	738
ERIC2_c05400	queF	NADPH-dependent 7-cyano-7-deazaguanine reductase QueF	535914	519
ERIC2_c05410		hypothetical protein	536841	804
ERIC2_c05420	ytjP	putative dipeptidase YtjP	537769	1443
ERIC2_c05440		hypothetical protein	540864	402
ERIC2_c05450	nhaC2	Na(+)/H(+) antiporter NhaC	541371	1422
ERIC2_c05460		RNA polymerase sigma factor SigW-like protein	543028	549
ERIC2_c05470		hypothetical protein	543596	585
ERIC2_c05480		hypothetical protein	544450	255
ERIC2_c05490		hypothetical protein	544743	219
ERIC2_c05500		hypothetical protein	545167	531
ERIC2_c05520		FAD-dependent glycine oxidase-like protein	546725	813
ERIC2_c05530	thiS	sulfur carrier protein ThiS	547603	195
ERIC2_c05540	thiG	thiazole synthase ThiG	547799	801
ERIC2_c05550	thiD	hydroxymethylpyrimidine/phosphomethylpyrimidine kinase ThiD	548596	927
ERIC2_c05580		hypothetical protein	551848	237
ERIC2_c05600	tnpR	resolvase	553768	411
ERIC2_c05620		hypothetical protein	554969	168
ERIC2_c05621		hypothetical protein	555165	102
ERIC2_c05630		putative bacteriocin	555501	378
ERIC2_c05640		putative transposase	556208	249
ERIC2_c05660		hypothetical protein	557429	357
ERIC2_c05700		hypothetical protein	562040	306
ERIC2_c05710	romA	outer membrane protein RomA	562670	990
ERIC2_c05720		PBS lyase HEAT-like repeat protein	563835	1095
ERIC2_c05721		hypothetical protein	564990	102
ERIC2_c05730		guanylate kinase-like protein	565249	585
ERIC2_c05740	ctaC	cytochrome c oxidase subunit 2	566387	993
ERIC2_c05750	ctaD	cytochrome c oxidase subunit 1	567506	2487
ERIC2_c05760		cytochrome C oxidase subunit IV	569997	315
ERIC2_c05770	ctaG	putative cytochrome c oxidase assembly factor CtaG	570438	867
ERIC2_c05780		transposase, IS605 family	571475	282
ERIC2_c05810		hypothetical protein	574994	1269
ERIC2_c05820		L-2,4-diaminobutyrate decarboxylase	576597	1638
ERIC2_c05830		multidrug resistance protein	578459	798
ERIC2_c05840		type I phosphodiesterase/nucleotide pyrophosphatase	579257	486
ERIC2_c05880	patB	cystathionine beta-lyase PatB	583790	1179
ERIC2_c05890		polysaccharide deacetylase	585151	807
ERIC2_c05910		hypothetical protein	586405	834
ERIC2_c05920	fabF1	3-oxoacyl-[acyl-carrier-protein] synthase 2	587366	1239
ERIC2_c05930	maa	putative maltose O-acetyltransferase Maa	589087	570
ERIC2_c05940		transcriptional regulator-like protein	589926	297
ERIC2_c05960		hypothetical protein	591754	171
ERIC2_c05970		hypothetical protein	591927	369
ERIC2_c05980		hypothetical protein	592441	165
ERIC2_c05990		putative inner membrane protein	592658	1209
ERIC2_c06010		hypothetical protein	596038	252
ERIC2_c06030		hypothetical protein	596885	429
ERIC2_c06040		putative toxin-antitoxin system, toxin component	597670	426
ERIC2_c06050		transcriptional regulator, ArsR family	598097	372
ERIC2_c06060		methylated-DNA-protein- cysteinemethyltransferase	598729	318
ERIC2_c06070		hypothetical protein	599203	219
ERIC2_c06080		hypothetical protein	599436	171
ERIC2_c06090		hypothetical protein	600003	486
ERIC2_c06100		hypothetical protein	600899	483
ERIC2_c06110		hypothetical protein	601905	300
ERIC2_c06120	yvaA	putative oxidoreductase YvaA	602289	1041
ERIC2_c06130	gapB	glyceraldehyde-3-phosphate dehydrogenase 2	603607	1062
ERIC2_c06140		transcriptional regulator, TetR family	604792	591
ERIC2_c06150		major facilitator superfamily MFS_1 protein	605448	1218
ERIC2_c06160		hypothetical protein	606923	984
ERIC2_c06170		hypothetical protein	608238	903
ERIC2_c06180		hypothetical protein	609137	792
ERIC2_c06190		glyoxalase family protein	610328	732
ERIC2_c06200		hypothetical protein	611110	483
ERIC2_c06210		putative cell-wall hydrolase	611666	522
ERIC2_c06220	ykoH	sensor histidine kinase YkoH	612345	1380
ERIC2_c06260	bcrC	undecaprenyl-diphosphatase BcrC	616283	594
ERIC2_c06270	ecsA1	ABC-type transporter ATP-binding protein EcsA	617095	738
ERIC2_c06280		hypothetical protein	617872	195
ERIC2_c06310		hypothetical protein	619650	90
ERIC2_c06320		hypothetical protein	619848	513
ERIC2_c06330		hypothetical protein	620433	369
ERIC2_c06340		hypothetical protein	620900	1224
ERIC2_c06350		Ser/Thr phosphatase family protein	622168	1023
ERIC2_c06360		hypothetical protein	623330	687
ERIC2_c06370		hypothetical protein	624276	291
ERIC2_c06380	pspA	phage shock protein A, PspA	624630	657
ERIC2_c06390	pspC	phage shock protein C, PspC	625293	519
ERIC2_c06400		PspA/IM30 family protein	625814	723
ERIC2_c06410	lgt2	prolipoprotein diacylglyceryl transferase Lgt	626654	867
ERIC2_c06420		hypothetical protein	627524	354
ERIC2_c06430		hypothetical protein	628049	402
ERIC2_c06440	nadE	NH(3)-dependent NAD(+) ligase	628897	807
ERIC2_c06450	yhcH	putative ABC transporter ATP-binding protein YhcH	629839	996
ERIC2_c06460		hypothetical protein	630887	846
ERIC2_c06470	acpS	holo-[acyl-carrier-protein] synthase AcpS	631827	393
ERIC2_c06480		hypothetical protein	632298	444
ERIC2_c06500		site-specific recombinase XerD	634274	351
ERIC2_c06510		putative transcriptional regulator	634938	444
ERIC2_c06520		hypothetical protein	635737	372
ERIC2_c06530		sporulation kinase	636185	1512
ERIC2_c06540		hypothetical protein	637720	261
ERIC2_c06550		hypothetical protein	638026	417
ERIC2_c06560		RNA binding-like protein	638707	312
ERIC2_c06570		hypothetical protein	639160	195
ERIC2_c06590	mtnA1	methylthioribose-1-phosphate isomerase 1	640178	1107
ERIC2_c06600	mtnK	methylthioribose kinase MtnK	641304	1230
ERIC2_c06610		DNA protection protein	642752	450
ERIC2_c06630		hypothetical protein	644784	558
ERIC2_c06640	sufC	FeS assembly ATPase SufC	645522	834
ERIC2_c06650	sufD	FeS assembly protein SufD	646423	1296
ERIC2_c06660	csd	putative cysteine desulfurase Csd	647715	1227
ERIC2_c06670		SUF system FeS assembly protein, NifU family	648961	405
ERIC2_c06680	sufB	FeS cluster assembly protein SufB	649390	1398
ERIC2_c06690		hypothetical protein	651030	192
ERIC2_c06710		hypothetical protein	652650	348
ERIC2_c06720		hypothetical protein	653268	180
ERIC2_c06740		hypothetical protein	654445	603
ERIC2_c06760		hypothetical protein	655410	402
ERIC2_c06780		hypothetical protein	656725	231
ERIC2_c06800		phage related protein	657454	669
ERIC2_c06850		hypothetical protein	660273	273
ERIC2_c06870		hypothetical protein	662005	750
ERIC2_c06890		transposase	664155	237
ERIC2_c06900		transposase-like protein	664433	795
ERIC2_c06920		transposase	665985	345
ERIC2_c06930		hypothetical protein	666351	267
ERIC2_c06940		hypothetical protein	666701	1044
ERIC2_c06950		hypothetical protein	667854	216
ERIC2_c06960		hypothetical protein	668432	399
ERIC2_c06980		hypothetical protein	670419	1008
ERIC2_c07000		hypothetical protein	672940	333
ERIC2_c07010		hypothetical protein	673465	969
ERIC2_c07020	yunD	putative metallophosphoesterase YunD	674618	1416
ERIC2_c07030	uppP	undecaprenyl-diphosphatase UppP	676178	852
ERIC2_c07050		radical SAM domain protein	678793	1125
ERIC2_c07060		hypothetical protein	679970	1371
ERIC2_c07090		hypothetical protein	683295	228
ERIC2_c07100		spore coat peptide assembly protein	683743	267
ERIC2_c07110	cotJC	protein CotJC	684111	510
ERIC2_c07120		hypothetical protein	685013	297
ERIC2_c07130		hypothetical protein	685539	906
ERIC2_c07140		transposase	686528	174
ERIC2_c07150		hypothetical protein	687648	198
ERIC2_c07170		hypothetical protein	689988	1194
ERIC2_c07180		hypothetical protein	691595	168
ERIC2_c07190		hypothetical protein	692309	309
ERIC2_c07220		hypothetical protein	694967	441
ERIC2_c07230		hypothetical protein	695783	297
ERIC2_c07240		hypothetical protein	696255	264
ERIC2_c07250		hypothetical protein	696573	384
ERIC2_c07251		hypothetical protein	697022	180
ERIC2_c07260	spsI2	spore coat polysaccharide biosynthesis protein SpsI	697198	771
ERIC2_c07280		hypothetical protein	698901	891
ERIC2_c07290		hypothetical protein	699887	1011
ERIC2_c07300	lytE	putative endopeptidase LytE	701145	1065
ERIC2_c07310		toxin secretion/phage lysis holin	702526	399
ERIC2_c07320	yusZ	putative oxidoreductase YusZ	703027	522
ERIC2_c07340		pirin domain protein	703967	708
ERIC2_c07350	nagA	N-acetylglucosamine-6-phosphate deacetylase NagA	704761	1170
ERIC2_c07360	nagB	glucosamine-6-phosphate deaminase NagB	705927	729
ERIC2_c07370		transcriptional regulator, RpiR family	706659	993
ERIC2_c07380		hypothetical protein	707703	669
ERIC2_c07390		hypothetical protein	708420	1206
ERIC2_c07400		hypothetical protein	709644	1965
ERIC2_c07420		membrane integrity-associated integral inner membrane protein	713356	528
ERIC2_c07450		A/G-specific adenine glycosylase	716265	1173
ERIC2_c07460		hypothetical protein	717504	345
ERIC2_c07461		hypothetical protein	718403	144
ERIC2_c07471		hypothetical protein	720061	210
ERIC2_c07490	potA	spermidine/putrescine import ATP-binding protein potA	721826	948
ERIC2_c07500	potB	putative pleiotropic drug resistance protein	722789	777
ERIC2_c07510	potC	ABC-2 type transport system permease protein PotC	723643	906
ERIC2_c07520		HTH-type transcriptional regulator MalT	724609	2619
ERIC2_c07530	sodA2	superoxide dismutase	727345	615
ERIC2_c07531		hypothetical protein	728219	111
ERIC2_c07540	purR1	HTH-type transcriptional repressor PurR	728623	1005
ERIC2_c07550		hypothetical protein	729673	975
ERIC2_c07560		putative 6-phospho-beta-glucosidase	730653	1302
ERIC2_c07570	opuCA	glycine betaine/carnitine/choline transport ATP-binding protein OpuCA	732290	1236
ERIC2_c07580	opuBB	choline transport system permease protein OpuBB	733522	657
ERIC2_c07590	opuBC	choline-binding protein	734180	909
ERIC2_c07600	opuCD	glycine betaine/carnitine/choline transport system permease protein OpuCD	735132	630
ERIC2_c07610		hypothetical protein	736042	429
ERIC2_c07620		hypothetical protein	736751	588
ERIC2_c07630		putative iron-sulfur cluster binding protein	737367	1170
ERIC2_c07640		metal dependent phosphohydrolase	738607	1035
ERIC2_c07651		hypothetical protein	741138	210
ERIC2_c07660	folE	GTP cyclohydrolase 1	741703	591
ERIC2_c07670	sodF	putative superoxide dismutase	742514	1281
ERIC2_c07680		hypothetical protein	743868	1032
ERIC2_c07690		transcriptional regulator, IclR family, C-terminal domain protein	745237	744
ERIC2_c07700		CDF family cation diffusion facilitator	746088	972
ERIC2_c07710	acn	aconitate hydratase Acn	747219	2700
ERIC2_c07720		hypothetical protein	749997	153
ERIC2_c07730		two-component response regulator	750261	1020
ERIC2_c07740	ddl	D-alanine--D-alanine ligase Ddl	751303	1122
ERIC2_c07750		hypothetical protein	752548	189
ERIC2_c07760	uvsE	UV DNA damage endonuclease UvsE	752937	1029
ERIC2_c07770	fabI	enoyl-[acyl-carrier-protein] reductase [NADH] FabI	754154	771
ERIC2_c07780		hypothetical protein	755058	285
ERIC2_c07800	suhB	inositol-1-monophosphatase SuhB	755859	855
ERIC2_c07810		sugar phosphate isomerase/epimerase	756796	438
ERIC2_c07820	bioB	biotin synthase BioB	757394	1005
ERIC2_c07830	gltA	glutamate synthase [NADPH] large chain GltA	758474	4512
ERIC2_c07840	hemL2	glutamate-1-semialdehyde 2,1-aminomutase 1	763511	1314
ERIC2_c07850	lytR1	transcriptional regulator LytR	764916	1026
ERIC2_c07860		peroxiredoxin-like protein	766272	690
ERIC2_c07870	yheN1	putative polysaccharide deacetylase YheN	767253	1356
ERIC2_c07900		hypothetical protein	770299	489
ERIC2_c07910		putative ABC transporter ATP-binding protein	770784	1581
ERIC2_c07920		putative ABC transporter ATP-binding protein	772511	1884
ERIC2_c07930		hypothetical protein	774437	672
ERIC2_c07940	guaA	putative GMP synthase	775414	1539
ERIC2_c07951		hypothetical protein	778592	174
ERIC2_c07960	vanA	vancomycin/teicoplanin A-type resistance protein VanA	778783	1032
ERIC2_c07990		hypothetical protein	781812	201
ERIC2_c08000		putative permease	782065	1395
ERIC2_c08080	degA	HTH-type transcriptional regulator DegA	791447	1008
ERIC2_c08090	iolB	5-deoxy-glucuronate isomerase IolB	792648	792
ERIC2_c08100		oxidoreductase domain protein	793500	1026
ERIC2_c08110	iolC	5-dehydro-2-deoxygluconokinase IolC	794861	1047
ERIC2_c08120	iolA3	methylmalonate semialdehyde dehydrogenase [acylating] 3	795926	1452
ERIC2_c08130	iolD	3D-(3,5/4)-trihydroxycyclohexane-1,2-dione hydrolase	797390	1935
ERIC2_c08140	iolE2	inosose dehydratase 2	799419	897
ERIC2_c08150	iolG	Myo-inositol 2-dehydrogenase IolG	800342	1068
ERIC2_c08190	nit	nitrilase Nit	804546	978
ERIC2_c08200	purE	N5-carboxyaminoimidazole ribonucleotide mutase PurE	805997	567
ERIC2_c08210	purK	N5-carboxyaminoimidazole ribonucleotide synthase PurK	806560	1296
ERIC2_c08220	purB	adenylosuccinate lyase PurB	807899	1320
ERIC2_c08230	purC	phosphoribosylaminoimidazole-succinocarboxamide synthase PurC	809277	900
ERIC2_c08240	purS	phosphoribosylformylglycinamidine synthase PurS	810267	243
ERIC2_c08250	purQ	phosphoribosylformylglycinamidine synthase 1	810583	696
ERIC2_c08260	purL	phosphoribosylformylglycinamidine synthase 2	811325	2175
ERIC2_c08270	purF	amidophosphoribosyltransferase PurF	813541	1518
ERIC2_c08280	purM	phosphoribosylformylglycinamidine cyclo-ligase PurM	815153	1047
ERIC2_c08290	purN	phosphoribosylglycinamide formyltransferase PurN	816196	624
ERIC2_c08300	purH	bifunctional purine biosynthesis protein PurH	816988	1590
ERIC2_c08310	purD	phosphoribosylamine--glycine ligase PurD	818596	1281
ERIC2_c08320		hypothetical protein	820443	168
ERIC2_c08330		NTP pyrophosphohydrolase-like protein	820963	483
ERIC2_c08340		hypothetical protein	821569	162
ERIC2_c08350		hypothetical protein	821772	435
ERIC2_c08360	yerB	putative lipoprotein YerB	822314	1074
ERIC2_c08370		hypothetical protein	823728	837
ERIC2_c08380		hypothetical protein	824586	291
ERIC2_c08390	cbiX	sirohydrochlorin cobaltochelatase CbiX	825044	789
ERIC2_c08400	dagK	diacylglycerol kinase DagK	825982	945
ERIC2_c08410	rlmCD	23S rRNA (uracil-C(5))-methyltransferase RlmCD	826923	1578
ERIC2_c08420		phage integrase family protein	828497	1221
ERIC2_c08440		immunity repressor protein	830251	660
ERIC2_c08450		hypothetical protein	831116	213
ERIC2_c08460		hypothetical protein	831380	219
ERIC2_c08470		hypothetical protein	831684	204
ERIC2_c08480		hypothetical protein	831936	297
ERIC2_c08490		hypothetical protein	832781	438
ERIC2_c08500		hypothetical protein	833295	678
ERIC2_c08510		hypothetical protein	834019	285
ERIC2_c08520		putative DNA wielding protein; mobile element region	834300	1377
ERIC2_c08530		hypothetical protein	835715	624
ERIC2_c08540		hypothetical protein	836449	279
ERIC2_c08550		hypothetical protein	836837	195
ERIC2_c08570		hypothetical protein	838551	669
ERIC2_c08590	nicK	putative DNA relaxase NicK	840133	1080
ERIC2_c08600		hypothetical protein	841244	483
ERIC2_c08610		putative phage-related protein	841772	576
ERIC2_c08620		hypothetical protein	842404	207
ERIC2_c08630		hypothetical protein	842631	351
ERIC2_c08640		helix-turn-helix protein	843085	489
ERIC2_c08650		hypothetical protein	843614	633
ERIC2_c08660		hypothetical protein	844325	426
ERIC2_c08670		hypothetical protein	844996	195
ERIC2_c08680		hypothetical protein	845195	207
ERIC2_c08690		hypothetical protein	845431	261
ERIC2_c08700		hypothetical protein	845775	363
ERIC2_c08720		hypothetical protein	846708	252
ERIC2_c08730		hypothetical protein	846994	156
ERIC2_c08740		hypothetical protein	847225	240
ERIC2_c08750		hypothetical protein	847468	927
ERIC2_c08760		hypothetical protein	848659	2592
ERIC2_c08770		hypothetical protein	851339	372
ERIC2_c08780		hypothetical protein	851724	357
ERIC2_c08790		archaeal flagella assembly protein J	852085	693
ERIC2_c08800		type II/IV secretion system protein	852816	1068
ERIC2_c08810		hypothetical protein	853892	738
ERIC2_c08820		hypothetical protein	854657	984
ERIC2_c08830		hypothetical protein	855859	438
ERIC2_c08840		hypothetical protein	856316	2454
ERIC2_c08850		conjugative transposon membrane protein	858896	2277
ERIC2_c08860		putative conjugation protein	861169	990
ERIC2_c08870		hypothetical protein	862160	549
ERIC2_c08880		hypothetical protein	863202	486
ERIC2_c08900		hypothetical protein	864347	243
ERIC2_c08910		phage related protein	864787	2277
ERIC2_c08940		hypothetical protein	869367	669
ERIC2_c08961		hypothetical protein	871262	183
ERIC2_c08970	tlpB	methyl-accepting chemotaxis protein TlpB	871614	1995
ERIC2_c08971		hypothetical protein	873793	237
ERIC2_c08980		hypothetical protein	874212	369
ERIC2_c08990		transcriptional regulator, LuxR family	874802	264
ERIC2_c09000		intracellular serine protease	875062	1011
ERIC2_c09010		ABC transporter-like protein	876088	699
ERIC2_c09020		ABC transporter-like protein	876792	1155
ERIC2_c09040		hypothetical protein	880226	162
ERIC2_c09050		taurine catabolism dioxygenase TauD/TfdA	880387	513
ERIC2_c09060	natA2	ATP-binding transport protein NatA	880945	1026
ERIC2_c09070		putative ABC transporter, permease protein	881984	771
ERIC2_c09080		putative ABC transporter, permease protein	882759	798
ERIC2_c09090	htpG	chaperone protein HtpG	884284	1884
ERIC2_c09110	fic	filamentation induced by cAMP protein Fic	888000	1107
ERIC2_c09120		export ABC transporter ATP-binding protein	889443	948
ERIC2_c09130		ABC transporter-like protein	890567	1155
ERIC2_c09140		thioesterase superfamily protein	891778	369
ERIC2_c09150		malonyl-CoA-[acyl-carrier-protein] transacylase	892143	951
ERIC2_c09180		acyl carrier protein	895351	288
ERIC2_c09190	fabZ2	(3R)-hydroxymyristoyl-[acyl-carrier-protein] dehydratase FabZ	895645	489
ERIC2_c09200		putative acetyltransferase	896130	2799
ERIC2_c09230	gcvT1	aminomethyltransferase GcvT	900091	1047
ERIC2_c09240	fabF2	3-oxoacyl-[acyl-carrier-protein] synthase	901149	2448
ERIC2_c09250		hypothetical protein	903784	213
ERIC2_c09260		toxin-like protein	904080	450
ERIC2_c09270		toxin-like protein	904618	156
ERIC2_c09280		toxin-like protein	904895	1350
ERIC2_c09300		hypothetical protein	908321	192
ERIC2_c09310		hypothetical protein	908525	192
ERIC2_c09320		hypothetical protein	908907	597
ERIC2_c09330	gbsB	alcohol dehydrogenase GbsB	909605	1197
ERIC2_c09340	gbsA	betaine aldehyde dehydrogenase GbsA	910833	1473
ERIC2_c09371		hypothetical protein	915771	132
ERIC2_c09440		hypothetical protein	923410	729
ERIC2_c09450	pdhA1	pyruvate dehydrogenase E1 component subunit alpha	924324	1113
ERIC2_c09460	pdhB1	pyruvate dehydrogenase E1 component subunit beta	925486	981
ERIC2_c09470	pdhC1	pyruvate dehydrogenase E2 dihydrolipoamide acyltransferase component	926525	1308
ERIC2_c09480	pdhD1	dihydrolipoyl dehydrogenase PdhD	927837	1416
ERIC2_c09490		glycerophosphodiester phosphodiesterase-like protein	929497	741
ERIC2_c09500	hprA	glycerate dehydrogenase HprA	930263	978
ERIC2_c09560		hypothetical protein	935844	462
ERIC2_c09570		hypothetical protein	936367	1059
ERIC2_c09580		fructose amino acid-binding lipoprotein-like protein	937598	1044
ERIC2_c09590		ABC transporter, permease protein	938670	477
ERIC2_c09600		hypothetical protein	939174	177
ERIC2_c09610		fructose-amino acid permease-like protein	939418	372
ERIC2_c09620		hypothetical protein	939802	198
ERIC2_c09630		hypothetical protein	940028	396
ERIC2_c09640		transcriptional regulator-like protein	940463	315
ERIC2_c09650		putative beta-hexosaminidase A	940809	1566
ERIC2_c09651		hypothetical protein	942490	144
ERIC2_c09660		putative lipoprotein	942974	747
ERIC2_c09670		hypothetical protein	943805	951
ERIC2_c09680	pncB	nicotinate phosphoribosyltransferase PncB	944839	1470
ERIC2_c09690		ribonucleoside-triphosphate reductase class III catalytic subunit	946611	1848
ERIC2_c09710		hypothetical protein	949057	267
ERIC2_c09720		efflux transporter-like protein	949488	525
ERIC2_c09730	cobB1	cobyrinic acid A,C-diamide synthase	950199	729
ERIC2_c09750		putative MFS-type transporter	953111	1212
ERIC2_c09760		GtrA family protein	954430	396
ERIC2_c09770		hypothetical protein	955055	210
ERIC2_c09780		hypothetical protein	955458	222
ERIC2_c09790		hypothetical protein	955805	402
ERIC2_c09800		transposase	956285	240
ERIC2_c09810		hypothetical protein	957422	765
ERIC2_c09820		hypothetical protein	958303	156
ERIC2_c09830		transporter permease-like protein	958537	273
ERIC2_c09840		hypothetical protein	958806	273
ERIC2_c09850		branched chain amino acid ABC transporter-like protein with ATP-binding domain	959214	309
ERIC2_c09860		ABC transporter-like protein	959519	504
ERIC2_c09870	pdhA2	pyruvate dehydrogenase E1 component subunit alpha	960023	1188
ERIC2_c09880	pdhB2	pyruvate dehydrogenase E1 component subunit beta	961228	963
ERIC2_c09890	pdhC2	pyruvate dehydrogenase component dihydrolipoyllysine-residue acetyltransferase	962213	1338
ERIC2_c09900	pdhD2	dihydrolipoyl dehydrogenase PdhD	963551	1443
ERIC2_c09910	paaA	phenylacetic acid degradation protein PaaA	964998	975
ERIC2_c09920	paaB	putative phenylacetate degradation protein PaaB	965969	342
ERIC2_c09930	paaC	putative phenylacetate degradation protein PaaC	966317	834
ERIC2_c09940	paaD	phenylacetic acid degradation protein PaaD	967164	492
ERIC2_c09950	gabD	succinate-semialdehyde dehydrogenase	967770	1425
ERIC2_c09960		hypothetical protein	969229	291
ERIC2_c09970		thioesterase superfamily protein	969516	399
ERIC2_c09980		enoyl-CoA hydratase/carnithine racemase	969951	834
ERIC2_c09990	paaK	phenylacetate-coenzyme A ligase PaaK	970795	1308
ERIC2_c10000		short chain enoyl-CoA hydratase	972099	774
ERIC2_c10010	paaG	putative enoyl-CoA hydratase PaaG	972885	792
ERIC2_c10020		3-hydroxybutyryl-CoA dehydrogenase	973680	861
ERIC2_c10030		3-hydroxybutyryl-CoA dehydrogenase	974548	726
ERIC2_c10040	pcaF	beta-ketoadipyl-CoA thiolase PcaF	975278	1200
ERIC2_c10050		hypothetical protein	976600	372
ERIC2_c10060	paaX	phenylacetic acid degradation operon negative regulatory protein PaaX	977146	822
ERIC2_c10080		hypothetical protein	979730	297
ERIC2_c10090		hypothetical protein	980034	1623
ERIC2_c10100		hypothetical protein	981671	378
ERIC2_c10110	ktrB1	Ktr system potassium uptake protein B	982568	1341
ERIC2_c10120		hypothetical protein	984148	1311
ERIC2_c10121		hypothetical protein	985522	147
ERIC2_c10130	cisA	putative DNA recombinase CisA	985695	1617
ERIC2_c10140	sigK	RNA polymerase sigma-28 factor SigK	987401	546
ERIC2_c10150		hypothetical protein	988219	243
ERIC2_c10160		hypothetical protein	988486	969
ERIC2_c10170	spoVAC	stage V sporulation protein AC	989471	492
ERIC2_c10180	spoVAD	stage V sporulation protein AD	989965	1014
ERIC2_c10190		stage V sporulation protein AE	990985	357
ERIC2_c10200		hypothetical protein	991563	966
ERIC2_c10210		hypothetical protein	992525	1257
ERIC2_c10220		protease, transglutaminase superfamily	993822	2181
ERIC2_c10230		HAD phosphatase, family IIIA	996114	498
ERIC2_c10240	yqeH	ribosome biogenesis GTPase YqeH	996720	1113
ERIC2_c10250	aroE	shikimate dehydrogenase AroE	997874	861
ERIC2_c10260	yqeI	putative RNA-binding protein YqeI	998748	291
ERIC2_c10270	nadD	putative nicotinate-nucleotide adenylyltransferase NadD	999088	606
ERIC2_c10280		hydrolase, HD family	999719	540
ERIC2_c10290		hypothetical protein	1000378	285
ERIC2_c10300		RNA-binding-like protein	1000659	894
ERIC2_c10310		methyltransferase domain protein	1001554	795
ERIC2_c10320		hypothetical protein	1002482	174
ERIC2_c10330	leuS	leucine--tRNA ligase LeuS	1002814	2445
ERIC2_c10340	comER	ComE operon protein 4	1005262	828
ERIC2_c10350		membrane bound high-affinity DNA-binding receptor-like protein	1006258	534
ERIC2_c10360	mdeA	methionine gamma-lyase MdeA	1006884	1299
ERIC2_c10370		DNA transport-associated-like protein	1008208	513
ERIC2_c10380		DNA internalization competence protein ComEC/Rec2-like protein	1008835	1842
ERIC2_c10390		phage integrase-like protein	1010688	1233
ERIC2_c10400		transcriptional regulator-like protein	1011988	756
ERIC2_c10410		hypothetical protein	1012982	216
ERIC2_c10420		putative antirepressor, phage associated	1013451	711
ERIC2_c10430		hypothetical protein	1014370	261
ERIC2_c10431		hypothetical protein	1014672	192
ERIC2_c10440		hypothetical protein	1014900	441
ERIC2_c10450		hypothetical protein	1015337	222
ERIC2_c10460		hypothetical protein	1015696	234
ERIC2_c10470		hypothetical protein	1015959	165
ERIC2_c10480		putative prophage antirepressor	1016152	756
ERIC2_c10490		hypothetical protein	1016904	309
ERIC2_c10491		hypothetical protein	1017248	189
ERIC2_c10500		putative phage anti-repressor	1017448	762
ERIC2_c10510		hypothetical protein	1018245	171
ERIC2_c10520		hypothetical protein	1018452	264
ERIC2_c10530		hypothetical protein	1018723	432
ERIC2_c10540		hypothetical protein	1019151	579
ERIC2_c10550		hypothetical protein	1019799	1629
ERIC2_c10560		hypothetical protein	1021584	672
ERIC2_c10570		phage related protein	1022287	762
ERIC2_c10580		hypothetical protein	1023064	333
ERIC2_c10590		hypothetical protein	1023445	888
ERIC2_c10600		hypothetical protein	1024391	654
ERIC2_c10610		hypothetical protein	1025199	174
ERIC2_c10620		hypothetical protein	1025419	330
ERIC2_c10621		hypothetical protein	1025755	108
ERIC2_c10630		hypothetical protein	1025939	366
ERIC2_c10640		hypothetical protein	1026319	522
ERIC2_c10650		adenine-specific DNA methylase-like protein	1026837	744
ERIC2_c10660		hypothetical protein	1027674	309
ERIC2_c10670		hypothetical protein	1028213	243
ERIC2_c10680		positive control sigma-like factor	1028656	279
ERIC2_c10690		hypothetical protein	1029257	204
ERIC2_c10700		hypothetical protein	1029515	183
ERIC2_c10720		phage-related terminase-like protein large subunit	1030691	1158
ERIC2_c10760		hypothetical protein	1036372	363
ERIC2_c10810	ahpC	alkyl hydroperoxide reductase subunit C	1041301	570
ERIC2_c10820	ahpF	NADH dehydrogenase AhpF	1041879	1533
ERIC2_c10830		hypothetical protein	1043539	525
ERIC2_c10850		integrase family protein	1044374	243
ERIC2_c10870		spore coat-like protein	1046318	204
ERIC2_c10880		hypothetical protein	1046540	303
ERIC2_c10890		hypothetical protein	1046885	291
ERIC2_c10900		hypothetical protein	1047399	180
ERIC2_c10920		putative propanediol utilization protein	1049047	354
ERIC2_c10930		putative ethanolamine/propanediol utilization protein	1049412	402
ERIC2_c10950		putative sensor histidine kinase	1050643	1425
ERIC2_c10970	eutB	ethanolamine ammonia-lyase heavy chain EutB	1053667	1365
ERIC2_c10980	eutC	ethanolamine ammonia-lyase light chain EutC	1055053	951
ERIC2_c10990	eutL	ethanolamine utilization protein EutL	1056022	654
ERIC2_c11000		hypothetical protein	1056687	741
ERIC2_c11010	adhE1	aldehyde-alcohol dehydrogenase AdhE	1057578	1464
ERIC2_c11020	pduA	propanediol utilization protein PduA	1059091	288
ERIC2_c11030	eutT	ethanolamine utilization cobalamin adenosyltransferase EutT	1059436	915
ERIC2_c11040	pduL1	phosphate propanoyltransferase PduL	1060362	639
ERIC2_c11050		putative ethanolamine utilization protein	1061019	684
ERIC2_c11060	eutN	ethanolamine utilization protein EutN	1061721	267
ERIC2_c11070		ethanolamine utilization protein	1062001	525
ERIC2_c11080	eutH	ethanolamine utilization protein EutH	1062545	1116
ERIC2_c11081		hypothetical protein	1063663	111
ERIC2_c11090		methyltransferase type 11	1063989	849
ERIC2_c11100		hypothetical protein	1064965	165
ERIC2_c11110		hypothetical protein	1065177	162
ERIC2_c11120		hypothetical protein	1066241	228
ERIC2_c11130		hypothetical protein	1066491	213
ERIC2_c11140		putative DNA-binding protein	1066802	462
ERIC2_c11141		hypothetical protein	1067260	132
ERIC2_c11160		hypothetical protein	1068156	330
ERIC2_c11161		hypothetical protein	1068502	525
ERIC2_c11170		hypothetical protein	1069129	381
ERIC2_c11180		hypothetical protein	1069781	303
ERIC2_c11190		hypothetical protein	1070469	438
ERIC2_c11200		transcriptional regulatory protein	1071181	639
ERIC2_c11210		hypothetical protein	1071819	183
ERIC2_c11220	selD	selenide, water dikinase	1072108	1062
ERIC2_c11230	selU	tRNA 2-selenouridine synthase SelU	1073215	1062
ERIC2_c11240		hypothetical protein	1074537	471
ERIC2_c11250		hypothetical protein	1075070	378
ERIC2_c11270	yjcK	putative ribosomal-protein-alanine acetyltransferase YjcK	1077617	573
ERIC2_c11290		hypothetical protein	1079499	306
ERIC2_c11310		putative transposase	1081226	141
ERIC2_c11320		transposase	1081536	231
ERIC2_c11330	melA	alpha-galactosidase MelA	1082124	1299
ERIC2_c11340		hypothetical protein	1083724	270
ERIC2_c11341		hypothetical protein	1084171	147
ERIC2_c11380		transcriptional regulator-like protein	1089208	447
ERIC2_c11390	yfmO	multidrug efflux protein YfmO	1089680	1197
ERIC2_c11400	murI	glutamate racemase MurI	1091050	807
ERIC2_c11410		gamma-D-glutamyl-L-diamino acid endopeptidase 1	1091935	1230
ERIC2_c11420		hypothetical protein	1093249	309
ERIC2_c11430		hypothetical protein	1093683	282
ERIC2_c11440		hypothetical protein	1093998	192
ERIC2_c11450		putative transporter protein	1094448	354
ERIC2_c11460		putative transporter protein	1094879	861
ERIC2_c11480		hypothetical protein	1097229	348
ERIC2_c11490		permease-like protein	1097674	1125
ERIC2_c11500	map1	methionine aminopeptidase Map	1098803	753
ERIC2_c11510		hypothetical protein	1099813	303
ERIC2_c11520		hypothetical protein	1100115	225
ERIC2_c11530		hypothetical protein	1100490	234
ERIC2_c11540		hypothetical protein	1100801	1143
ERIC2_c11550	ypsC	putative RNA methyltransferase YpsC	1102053	1122
ERIC2_c11560		acyl-CoA O-methyltransferase-like protein	1103324	636
ERIC2_c11570	mdtG	multidrug resistance protein MdtG	1104011	1263
ERIC2_c11580		spore coat protein	1105342	660
ERIC2_c11610	tarA	putative N-acetylmannosaminyltransferase TarA	1108237	741
ERIC2_c11620		hypothetical protein	1109029	999
ERIC2_c11650		hypothetical protein	1111470	360
ERIC2_c11660		oligoendopeptidase F-like protein	1111892	1791
ERIC2_c11670		integral membrane protein, YjbE family	1114300	861
ERIC2_c11680		hypothetical protein	1115451	297
ERIC2_c11690	cspB	cold shock protein CspB	1115884	198
ERIC2_c11700		hypothetical protein	1116288	741
ERIC2_c11710		oxidoreductase-like protein	1117086	645
ERIC2_c11720		serine hydroxymethyltransferase	1118080	297
ERIC2_c11730		hypothetical protein	1118497	657
ERIC2_c11740		hypothetical protein	1119155	1080
ERIC2_c11750	pfkA	6-phosphofructokinase PfkA	1120279	966
ERIC2_c11760		hypothetical protein	1121385	303
ERIC2_c11770		oxidoreductase NAD-like protein	1121720	552
ERIC2_c11780	cydA	cytochrome d ubiquinol oxidase subunit 1	1122681	1407
ERIC2_c11800	cydC	ATP-binding/permease protein CydC	1125087	1725
ERIC2_c11810	cydD	ATP-binding/permease protein CydD	1126808	1758
ERIC2_c11820	tatA	Sec-independent protein translocase protein TatA	1128663	237
ERIC2_c11830		hypothetical protein	1129148	189
ERIC2_c11840		hypothetical protein	1129481	789
ERIC2_c11860	yhgD	putative HTH-type transcriptional regulator YhgD	1131922	576
ERIC2_c11870		putative lipoprotein	1132795	669
ERIC2_c11880		hypothetical protein	1133492	534
ERIC2_c11890	cshA1	DEAD-box ATP-dependent RNA helicase CshA	1134397	1518
ERIC2_c11900		hypothetical protein	1136030	720
ERIC2_c11910	tal	putative transaldolase Tal	1137209	657
ERIC2_c11920	glpX	fructose-1,6-bisphosphatase class 2	1137901	1008
ERIC2_c11950		hypothetical protein	1142122	372
ERIC2_c11960	tpx	putative thiol peroxidase Tpx	1142578	519
ERIC2_c11970	gltC	HTH-type transcriptional regulator GltC	1143242	930
ERIC2_c11980	yugP	putative membrane protease YugP	1144189	708
ERIC2_c11990		copper efflux transcriptional regulator-like protein	1144915	408
ERIC2_c12010		hypothetical protein	1147024	492
ERIC2_c12020	yitG	putative MFS-type transporter YitG	1147543	1284
ERIC2_c12030		thiol-disulfide oxidoreductase ResA family protein	1149010	570
ERIC2_c12040		2-isopropylmalate synthase/homocitrate synthase family protein	1149807	1539
ERIC2_c12050	dinB1	DNA polymerase IV 1	1151545	1284
ERIC2_c12060	fer	ferredoxin Fer	1152908	234
ERIC2_c12070		murein transglycosylase-like protein	1153257	1503
ERIC2_c12071		hypothetical protein	1154913	150
ERIC2_c12080	pyrD1	dihydroorotate dehydrogenase	1155243	1098
ERIC2_c12090	yjbM	GTP pyrophosphokinase YjbM	1156367	807
ERIC2_c12100		hypothetical protein	1157170	420
ERIC2_c12110	ytzG	putative RNA pseudouridine synthase YtzG	1157765	771
ERIC2_c12120		Cof-like hydrolase	1158563	804
ERIC2_c12130		multidrug resistance protein	1159392	1548
ERIC2_c12140		hypothetical protein	1161092	504
ERIC2_c12150		hypothetical protein	1161842	198
ERIC2_c12160	trxA1	thioredoxin TrxA	1162165	318
ERIC2_c12180	rsmF	ribosomal RNA small subunit methyltransferase F	1162839	1398
ERIC2_c12190	rpiA	ribose-5-phosphate isomerase A	1164331	648
ERIC2_c12200	glpD	aerobic glycerol-3-phosphate dehydrogenase GlpD	1165114	1524
ERIC2_c12210	glpK	glycerol kinase GlpK	1166976	1491
ERIC2_c12220	glpF	glycerol uptake facilitator protein GlpF	1168515	807
ERIC2_c12230	glpP	glycerol uptake operon antiterminator regulatory protein GlpP	1169512	558
ERIC2_c12240		DNA-binding helix-turn-helix protein	1170267	420
ERIC2_c12250		transcriptional repressor-like protein	1170932	390
ERIC2_c12260		hypothetical protein	1171409	291
ERIC2_c12270		glycosyl transferase group 1	1172244	1125
ERIC2_c12280		Ser/Thr phosphatase family protein	1173374	1311
ERIC2_c12290		hypothetical protein	1174681	3258
ERIC2_c12300	lacC1	tagatose-6-phosphate kinase LacC	1178080	933
ERIC2_c12310	gatY1	D-tagatose-1,6-bisphosphate aldolase subunit GatY	1179086	873
ERIC2_c12320		transcriptional regulator, DeoR family	1180216	798
ERIC2_c12330		transporter-like protein	1181115	1002
ERIC2_c12340		membrane phosphatase-like protein	1182276	645
ERIC2_c12380		hypothetical protein	1184736	645
ERIC2_c12400		hypothetical protein	1187270	294
ERIC2_c12410		permease-like protein	1187845	366
ERIC2_c12420	mntA	manganese-binding lipoprotein MntA	1188351	966
ERIC2_c12430	mntB	manganese transport system ATP-binding protein MntB	1189332	753
ERIC2_c12440	mntC	manganese transport system membrane protein MntC	1190141	930
ERIC2_c12450	mntD	manganese transport system membrane protein MntD	1191067	882
ERIC2_c12460	braB	branched-chain amino acid transport system carrier protein BraB	1192345	1284
ERIC2_c12480		hypothetical protein	1195456	363
ERIC2_c12490		hypothetical protein	1195987	240
ERIC2_c12500		hypothetical protein	1196362	273
ERIC2_c12510		hypothetical protein	1196742	252
ERIC2_c12520		hypothetical protein	1197030	192
ERIC2_c12530		carboxymuconolactone decarboxylase	1197313	339
ERIC2_c12540		hypothetical protein	1197747	300
ERIC2_c12550	bfmBC	dihydrolipoamide dehydrogenase	1198205	1455
ERIC2_c12560	bfmBAA	2-oxoisovalerate dehydrogenase subunit alpha	1199735	1023
ERIC2_c12570	bfmBAB	2-oxoisovalerate dehydrogenase subunit beta	1200815	942
ERIC2_c12580	bfmBB	branched-chain alpha-keto acid dehydrogenase component lipoamide acyltransferase	1201777	1362
ERIC2_c12590		hypothetical protein	1203317	1125
ERIC2_c12620		transcriptional regulator LytR-like protein	1206182	987
ERIC2_c12630		hypothetical protein	1207188	165
ERIC2_c12640	nudF	ADP-ribose pyrophosphatase NudF	1207480	555
ERIC2_c12650		hypothetical protein	1208037	1194
ERIC2_c12660	spoIIM	stage II sporulation protein M	1209463	645
ERIC2_c12670	fur	ferric uptake regulation protein Fur	1210207	486
ERIC2_c12680	ald	alanine dehydrogenase Ald	1210999	1122
ERIC2_c12690		hypothetical protein	1212186	234
ERIC2_c12700	xerD	tyrosine recombinase XerD	1212516	897
ERIC2_c12710	deoB	phosphopentomutase DeoB	1213573	1176
ERIC2_c12720	punA1	purine nucleoside phosphorylase 1	1214817	825
ERIC2_c12730	punA2	purine nucleoside phosphorylase 1	1215658	858
ERIC2_c12740		hypothetical protein	1216738	405
ERIC2_c12750		hypothetical protein	1217202	237
ERIC2_c12760		hypothetical protein	1217488	684
ERIC2_c12770	nodI	Nod factor export ATP-binding protein I	1218168	849
ERIC2_c12780		hypothetical protein	1219045	768
ERIC2_c12790		RNA polymerase, sigma-24 subunit, ECF subfamily	1219838	570
ERIC2_c12800	dacF	D-alanyl-D-alanine carboxypeptidase DacF	1220564	1179
ERIC2_c12810	spoIIAA	anti-sigma F factor antagonist	1221798	420
ERIC2_c12820	spoIIAB	anti-sigma F factor	1222214	456
ERIC2_c12830	sigF	RNA polymerase sigma-F factor SigF	1222681	756
ERIC2_c12850		hypothetical protein	1224315	402
ERIC2_c12870		hypothetical protein	1225084	282
ERIC2_c12910	narH1	nitrate reductase beta chain NarH	1230453	1482
ERIC2_c12930	narI1	nitrate reductase gamma chain NarI	1232578	723
ERIC2_c12940		hypothetical protein	1233992	210
ERIC2_c12950		stage V sporulation-like protein AA	1234357	645
ERIC2_c12960		stage V sporulation protein AB	1235036	378
ERIC2_c12970	spoVAF	stage V sporulation protein AF	1235502	1770
ERIC2_c12980	lysA	diaminopimelate decarboxylase LysA	1237393	1338
ERIC2_c13000	ppiB	peptidyl-prolyl cis-trans isomerase B	1240351	438
ERIC2_c13020	ribD	riboflavin biosynthesis protein RibD	1241643	1203
ERIC2_c13030	ribE	riboflavin synthase alpha chain RibE	1242849	666
ERIC2_c13040	ribBA	riboflavin biosynthesis protein RibBA	1243564	1215
ERIC2_c13050	ribH	6,7-dimethyl-8-ribityllumazine synthase	1244813	471
ERIC2_c13060	scpA	segregation and condensation protein A	1245645	852
ERIC2_c13070	scpB	segregation and condensation protein B	1246534	573
ERIC2_c13080		hypothetical protein	1247272	708
ERIC2_c13090		hypothetical protein	1248059	507
ERIC2_c13100		citrate transporter	1248686	1302
ERIC2_c13110	dacB	D-alanyl-D-alanine carboxypeptidase DacB	1250227	1188
ERIC2_c13120	spmA	spore maturation protein A	1251439	591
ERIC2_c13130	spmB	spore maturation protein B	1252045	534
ERIC2_c13140		hypothetical protein	1252636	372
ERIC2_c13150	rluB	ribosomal large subunit pseudouridine synthase B	1253027	750
ERIC2_c13160	resA	thiol-disulfide oxidoreductase ResA	1253830	579
ERIC2_c13170	resB	cytochrome c biogenesis protein ResB	1254423	1671
ERIC2_c13180	resC	cytochrome c biogenesis protein ResC	1256090	1245
ERIC2_c13190	resD2	transcriptional regulatory protein ResD	1257410	714
ERIC2_c13200	resE1	sensor histidine kinase ResE	1258125	1854
ERIC2_c13210	serA	D-3-phosphoglycerate dehydrogenase SerA	1260102	1608
ERIC2_c13220	ppa	inorganic pyrophosphatase Ppa	1262150	489
ERIC2_c13240		hypothetical protein	1263135	621
ERIC2_c13250		hypothetical protein	1263752	222
ERIC2_c13260		hypothetical protein	1264084	372
ERIC2_c13270		adaptor-like protein	1264680	609
ERIC2_c13280	rocG1	NAD-specific glutamate dehydrogenase RocG	1265425	1251
ERIC2_c13290	prsW	protease PrsW	1266716	690
ERIC2_c13300		hypothetical protein	1267469	159
ERIC2_c13310	ypeB	sporulation protein YpeB	1267807	1353
ERIC2_c13340		cyclic diGMP binding-like domain-containing protein	1272416	426
ERIC2_c13350		hypothetical protein	1272906	243
ERIC2_c13360	cmk	cytidylate kinase Cmk	1273254	681
ERIC2_c13370	plsC	1-acyl-sn-glycerol-3-phosphate acyltransferase	1273931	591
ERIC2_c13380	ypfD	30S ribosomal S1-like protein	1274662	1236
ERIC2_c13390	fni	isopentenyl-diphosphate delta-isomerase Fni	1275952	1032
ERIC2_c13400		hypothetical protein	1277124	645
ERIC2_c13410		hypothetical protein	1277780	888
ERIC2_c13420		hypothetical protein	1278682	180
ERIC2_c13430		ribosome-associated GTPase	1278957	1332
ERIC2_c13440	plsY	glycerol-3-phosphate acyltransferase PlsY	1280301	594
ERIC2_c13450	gpsA	glycerol-3-phosphate dehydrogenase (NAD(P)+)	1280960	1029
ERIC2_c13460		hypothetical protein	1282069	282
ERIC2_c13470		hypothetical protein	1282540	300
ERIC2_c13480		hypothetical protein	1282890	396
ERIC2_c13500		putative lipoprotein	1283850	795
ERIC2_c13510	spoIVA	stage IV sporulation protein A	1285202	1479
ERIC2_c13511		hypothetical protein	1286699	243
ERIC2_c13520	hupA	DNA-binding protein HU 1	1286971	273
ERIC2_c13550		hypothetical protein	1287743	159
ERIC2_c13560		MtrB-like protein	1287987	234
ERIC2_c13570		hypothetical protein	1288406	489
ERIC2_c13580		heptaprenyl diphosphate synthase component I-like protein	1288982	864
ERIC2_c13590	ubiE	demethylmenaquinone methyltransferase UbiE	1289857	708
ERIC2_c13600		putative 4-hydroxybenzoate polyprenyltransferase	1290670	843
ERIC2_c13620		hypothetical protein	1292102	843
ERIC2_c13630	hepT2	heptaprenyl diphosphate synthase component 2	1292966	975
ERIC2_c13650	ndk	nucleoside diphosphate kinase Ndk	1295373	516
ERIC2_c13660	cheR	chemotaxis protein methyltransferase CheR	1296061	756
ERIC2_c13670		hypothetical protein	1296913	168
ERIC2_c13680	aroC	chorismate synthase AroC	1297258	1164
ERIC2_c13690	aroB	3-dehydroquinate synthase AroB	1298423	1107
ERIC2_c13700	aroH	chorismate mutase AroH	1299664	246
ERIC2_c13710	trpE	anthranilate synthase component 1	1300246	1557
ERIC2_c13720	trpD	anthranilate phosphoribosyltransferase TrpD	1301823	1047
ERIC2_c13750	trpB	tryptophan synthase beta chain TrpB	1304400	1197
ERIC2_c13760	trpA	tryptophan synthase alpha chain TrpA	1305593	813
ERIC2_c13770	hisC	histidinol-phosphate aminotransferase HisC	1306418	1110
ERIC2_c13780	tyrA	prephenate dehydrogenase TyrA	1307524	1086
ERIC2_c13790	phoE	putative phosphatase PhoE	1308915	597
ERIC2_c13800		hypothetical protein	1309690	1131
ERIC2_c13810		bacterial transferase hexapeptide repeat protein	1310870	531
ERIC2_c13820		hypothetical protein	1311452	186
ERIC2_c13830		hypothetical protein	1311869	519
ERIC2_c13850	qcrA	menaquinol-cytochrome c reductase iron-sulfur subunit QcrA	1314061	549
ERIC2_c13860	qcrB	menaquinol-cytochrome c reductase cytochrome b subunit QcrB	1314627	672
ERIC2_c13870	qcrC	menaquinol-cytochrome c reductase cytochrome b/c subunit QcrC	1315332	870
ERIC2_c13880		hypothetical protein	1316446	717
ERIC2_c13890		hypothetical protein	1317280	798
ERIC2_c13900		hypothetical protein	1318074	870
ERIC2_c13910		hypothetical protein	1319049	375
ERIC2_c13920		hypothetical protein	1319496	516
ERIC2_c13930	dapB	dihydrodipicolinate reductase DapB	1320194	804
ERIC2_c13950	ypjG	putative deacetylase YpjG	1321506	693
ERIC2_c13960	ypjH	putative glycosyltransferase YpjH	1322222	1161
ERIC2_c13970	cca	CCA-adding enzyme Cca	1323405	1359
ERIC2_c13990	panB	3-methyl-2-oxobutanoate hydroxymethyltransferase PanB	1326130	861
ERIC2_c14000	panC	pantothenate ligase PanC	1327037	903
ERIC2_c14010	panD	aspartate 1-decarboxylase PanD	1327944	372
ERIC2_c14020		tetratricopeptide repeat protein	1328330	678
ERIC2_c14030	dinG	putative ATP-dependent helicase dinG-like protein	1329064	2874
ERIC2_c14040	rex	redox-sensing transcriptional repressor Rex	1332054	519
ERIC2_c14050	pit	putative low-affinity inorganic phosphate transporter Pit	1332595	999
ERIC2_c14060		hypothetical protein	1333627	540
ERIC2_c14070	mtaD	5-methylthioadenosine/S-adenosylhomocysteine deaminase MtaD	1334578	1308
ERIC2_c14080		hypothetical protein	1336011	417
ERIC2_c14090		hypothetical protein	1336583	522
ERIC2_c14100	ftsH1	ATP-dependent zinc metalloprotease FtsH 1	1337202	1437
ERIC2_c14101		hypothetical protein	1338635	201
ERIC2_c14110	hbd	3-hydroxybutyryl-CoA dehydrogenase Hbd	1338869	873
ERIC2_c14120	ackA	acetate kinase AckA	1339843	1101
ERIC2_c14130	asnS	asparagine--tRNA ligase AsnS	1341017	1299
ERIC2_c14140		DNA-remodelling primosomal-like protein	1342340	672
ERIC2_c14150	ywaC1	GTP pyrophosphokinase YwaC	1343096	669
ERIC2_c14170	mtnB	methylthioribulose-1-phosphate dehydratase MtnB	1345352	666
ERIC2_c14180	mtnX	2-hydroxy-3-keto-5-methylthiopentenyl-1- phosphate phosphatase MtnX	1346031	636
ERIC2_c14190	mtnW	2,3-diketo-5-methylthiopentyl-1-phosphate enolase	1346663	1266
ERIC2_c14200	proH	pyrroline-5-carboxylate reductase 1	1348004	861
ERIC2_c14210	proA	gamma-glutamyl phosphate reductase ProA	1349004	1248
ERIC2_c14220	proB	glutamate 5-kinase ProB	1350273	1122
ERIC2_c14250		nitrilase/cyanide hydratase and apolipoprotein N-acyltransferase	1353109	900
ERIC2_c14260	spoIIE2	stage II sporulation protein E	1354206	234
ERIC2_c14270		ATPase/histidine kinase/DNA gyrase B/HSP90 domain protein	1354534	990
ERIC2_c14290		hypothetical protein	1356004	372
ERIC2_c14300		stage II sporulation protein	1356396	396
ERIC2_c14310		putative anti-sigma B factor	1356812	450
ERIC2_c14320	sigB	RNA polymerase sigma-B factor SigB	1357258	783
ERIC2_c14330		LysR substrate binding domain protein	1358361	909
ERIC2_c14340	leuC	3-isopropylmalate dehydratase large subunit LeuC	1359432	1407
ERIC2_c14350	leuD	3-isopropylmalate dehydratase small subunit LeuD	1360868	609
ERIC2_c14360		N-acetylmuramoyl-L-alanine amidase	1361715	1314
ERIC2_c14370		hypothetical protein	1363090	540
ERIC2_c14380	nth	putative endonuclease III	1363849	666
ERIC2_c14390		hypothetical protein	1364576	273
ERIC2_c14400		dynamin family protein	1364887	3696
ERIC2_c14420		hypothetical protein	1369649	285
ERIC2_c14430		exported lipase-like protein	1370254	813
ERIC2_c14440	bcrA	bacitracin ABC transporter, ATP-binding protein BcrA	1371114	978
ERIC2_c14450		hypothetical protein	1372093	984
ERIC2_c14460	parE	DNA topoisomerase 4 subunit B	1373104	1974
ERIC2_c14470	parC	DNA topoisomerase 4 subunit A	1375145	2454
ERIC2_c14480		transcriptional regulatory protein	1377663	954
ERIC2_c14490		putative oxidoreductase	1378716	579
ERIC2_c14520		aldo/keto reductase	1381160	933
ERIC2_c14530		hypothetical protein	1382112	1149
ERIC2_c14540		ABC transporter	1383278	786
ERIC2_c14550		hypothetical protein	1384232	771
ERIC2_c14560		ABC transporter-like protein	1385003	699
ERIC2_c14570		transcriptional regulatory protein	1385698	369
ERIC2_c14580		hypothetical protein	1386278	237
ERIC2_c14590		hypothetical protein	1386795	183
ERIC2_c14600		hypothetical protein	1387022	483
ERIC2_c14610		hypothetical protein	1387655	252
ERIC2_c14620		hypothetical protein	1387995	237
ERIC2_c14640	ndvB	glycosyltransferase family 36 protein	1390678	8397
ERIC2_c14670		hypothetical protein	1400832	339
ERIC2_c14690		transcriptional regulator-like protein	1403339	432
ERIC2_c14700		pseudouridine synthase, RluA family	1403781	732
ERIC2_c14710		hypothetical protein	1404516	867
ERIC2_c14720	glgB	1,4-alpha-glucan-branching enzyme	1405586	1935
ERIC2_c14730	glgC	glucose-1-phosphate adenylyltransferase GlgC	1407517	1149
ERIC2_c14740	glgD	glycogen biosynthesis protein GlgD	1408672	1110
ERIC2_c14750	glgA	glycogen synthase GlgA	1409797	1461
ERIC2_c14751		hypothetical protein	1411430	135
ERIC2_c14752		hypothetical protein	1411733	231
ERIC2_c14780		hypothetical protein	1415721	576
ERIC2_c14790		hypothetical protein	1416426	186
ERIC2_c14830	arcA	arginine deiminase ArcA	1421707	1242
ERIC2_c14840	arcB	ornithine carbamoyltransferase, catabolic	1422966	999
ERIC2_c14850	arcD1	arginine/ornithine antiporter ArcD	1424061	1416
ERIC2_c14860	arcC	carbamate kinase ArcC	1425478	969
ERIC2_c14870		hypothetical protein	1426485	687
ERIC2_c14880		hypothetical protein	1427227	498
ERIC2_c14890		putative FAD-dependent oxidoreductase	1427994	216
ERIC2_c14900		hypothetical protein	1428218	168
ERIC2_c14910		hypothetical protein	1428459	426
ERIC2_c14920		copper amine oxidase-like protein	1429013	864
ERIC2_c14930		hypothetical protein	1430218	1059
ERIC2_c14940		hypothetical protein	1431473	444
ERIC2_c14950		hypothetical protein	1432010	336
ERIC2_c14960		hypothetical protein	1432600	276
ERIC2_c14970		hypothetical protein	1433131	276
ERIC2_c14980		hypothetical protein	1433571	1764
ERIC2_c15000	cirD	ATP-binding protein CirD	1435649	663
ERIC2_c15010	btr	HTH-type transcriptional activator Btr	1436529	1671
ERIC2_c15020	feuA	iron-uptake system-binding protein FeuA	1438296	978
ERIC2_c15040	feuC	iron-uptake system permease protein FeuC	1440284	1029
ERIC2_c15060	gbpA1	GlcNAc-binding protein A	1443040	1197
ERIC2_c15070		transcriptional regulator, XRE family	1444404	837
ERIC2_c15080	besA	ferri-bacillibactin esterase BesA	1445303	876
ERIC2_c15090	cypA	cytochrome P450	1446326	1218
ERIC2_c15100		ATP-dependent OLD family endonuclease	1448027	1881
ERIC2_c15110		hypothetical protein	1449994	321
ERIC2_c15120		type I restriction enzyme EcoKI subunit R-like protein	1450684	240
ERIC2_c15121		type I restriction enzyme EcoKI subunit R-like protein	1450920	564
ERIC2_c15130	hsdS	type-1 restriction enzyme StySJI specificity protein HsdS	1451480	1233
ERIC2_c15140		hypothetical protein	1453061	150
ERIC2_c15150		hypothetical protein	1453351	435
ERIC2_c15170		hypothetical protein	1455271	2082
ERIC2_c15180		hypothetical protein	1457507	738
ERIC2_c15210		oxidoreductase domain protein	1459723	300
ERIC2_c15220		hypothetical protein	1460244	300
ERIC2_c15230		hypothetical protein	1460700	186
ERIC2_c15240		hypothetical protein	1461044	774
ERIC2_c15250		hypothetical protein	1461871	339
ERIC2_c15260		acyl-CoA hydrolase-like protein	1462223	477
ERIC2_c15270		sulfate/thiosulfate-binding protein	1463026	1110
ERIC2_c15280	cysU	sulfate transport system permease protein CysT	1464192	834
ERIC2_c15290	cysW	sulfate transport system permease protein CysW	1465036	873
ERIC2_c15300	cysA	sulfate/thiosulfate import ATP-binding protein CysA	1465931	1065
ERIC2_c15310		hypothetical protein	1467032	207
ERIC2_c15320	pbuO	guanine/hypoxanthine permease PbuO	1467383	1344
ERIC2_c15330		hypothetical protein	1468755	519
ERIC2_c15340		hypothetical protein	1469286	249
ERIC2_c15350	etfA	electron transfer flavoprotein subunit alpha	1470243	978
ERIC2_c15360	etfB	electron transfer flavoprotein subunit beta	1471237	762
ERIC2_c15370	fadR	fatty acid metabolism regulator protein FadR	1472080	594
ERIC2_c15380		hypothetical protein	1472867	2259
ERIC2_c15390	fadN	3-hydroxyacyl-CoA dehydrogenase FadN	1475214	2397
ERIC2_c15400	fadA	3-ketoacyl-CoA thiolase FadA	1477637	1227
ERIC2_c15410	fadE	putative acyl-CoA dehydrogenase FadE	1478925	1779
ERIC2_c15420	lcfA	long-chain-fatty-acid--CoA ligase LcfA	1480737	1683
ERIC2_c15430		hypothetical protein	1482541	432
ERIC2_c15440		hypothetical protein	1483061	342
ERIC2_c15450	glnQ1	glutamine transport ATP-binding protein GlnQ	1483709	774
ERIC2_c15460	glnH	ABC transporter glutamine-binding protein GlnH	1484505	855
ERIC2_c15470	glnM	putative glutamine ABC transporter permease protein GlnM	1485433	654
ERIC2_c15480	glnP	putative glutamine ABC transporter permease protein GlnP	1486105	660
ERIC2_c15490		amidohydrolase	1486851	1209
ERIC2_c15500		channel protein, hemolysin III family	1488427	639
ERIC2_c15510	artP	arginine ABC transporter, periplasmic arginine-binding protein ArtP	1489633	798
ERIC2_c15530	glnQ2	glutamine transport ATP-binding protein GlnQ	1491200	723
ERIC2_c15540		DegV family protein	1492000	846
ERIC2_c15550		EDD domain protein, DegV family	1492917	852
ERIC2_c15560		hypothetical protein	1493910	192
ERIC2_c15570		hypothetical protein	1494104	219
ERIC2_c15580		hypothetical protein	1494319	393
ERIC2_c15590		transcriptional activator-like protein	1494733	393
ERIC2_c15600		transcriptional antiterminator-like protein	1495277	723
ERIC2_c15610		phosphotransferase system lactose/cellobiose-specific IIB subunit	1495996	291
ERIC2_c15620		phosphodiesterase family protein	1496793	498
ERIC2_c15630		germination protein	1497470	1506
ERIC2_c15670		spore germination receptor subunit-like protein	1501479	1140
ERIC2_c15680		hypothetical protein	1502987	1539
ERIC2_c15700		coenzyme A disulfide reductase	1506008	1335
ERIC2_c15720	dhbA	2,3-dihydro-2,3-dihydroxybenzoate dehydrogenase	1509129	786
ERIC2_c15730	dhbC	isochorismate synthase DhbC	1509942	1227
ERIC2_c15740	dhbE	2,3-dihydroxybenzoate-AMP ligase	1511188	1626
ERIC2_c15750	dhbB	isochorismatase DhbB	1512847	927
ERIC2_c15760	dhbF	dimodular nonribosomal peptide synthase DhbF	1513779	7164
ERIC2_c15770		mbtH-like protein	1520942	201
ERIC2_c15780		hypothetical protein	1521162	579
ERIC2_c15790	topB	DNA topoisomerase 3	1521881	2268
ERIC2_c15820		hypothetical protein	1524935	963
ERIC2_c15830		hypothetical protein	1526023	342
ERIC2_c15840		ROK family protein	1526407	969
ERIC2_c15860		hypothetical protein	1529146	1077
ERIC2_c15870		thermophilic metalloprotease, M29 family	1530269	1116
ERIC2_c15880		transporter, major facilitator family protein	1531939	1203
ERIC2_c15890	udk	uridine kinase Udk	1533224	627
ERIC2_c15900		hypothetical protein	1534029	315
ERIC2_c15910		hypothetical protein	1534425	288
ERIC2_c15920		phospholipase, patatin family	1534822	930
ERIC2_c15930		ABC transporter, substrate-binding protein, putative	1536024	1032
ERIC2_c15940		hypothetical protein	1537098	291
ERIC2_c15950		ABC transporter, permease protein	1537385	768
ERIC2_c15960		ABC transporter, ATP-binding protein	1538164	783
ERIC2_c15970		TatD-related deoxyribonuclease	1538951	786
ERIC2_c15980	tag	DNA-3-methyladenine glycosylase 1	1539765	579
ERIC2_c15990		hypothetical protein	1540398	255
ERIC2_c16000		hypothetical protein	1540837	162
ERIC2_c16010	metQ	putative D-methionine-binding lipoprotein MetQ	1541136	828
ERIC2_c16020	metI	D-methionine transport system permease protein MetI	1542032	660
ERIC2_c16030	metN	methionine import ATP-binding protein MetN	1542695	1005
ERIC2_c16040		hypothetical protein	1543705	285
ERIC2_c16050		hypothetical protein	1544089	528
ERIC2_c16060		FAD-dependent disulfide oxidoreductase-like protein	1544805	975
ERIC2_c16070		hypothetical protein	1546012	414
ERIC2_c16080		ABC transporter, ATP-binding protein	1546659	327
ERIC2_c16090	ilvD	dihydroxy-acid dehydratase IlvD	1547090	1686
ERIC2_c16100		hypothetical protein	1548979	240
ERIC2_c16110		redoxin-like protein	1549483	246
ERIC2_c16120	trxB2	thioredoxin reductase TrxB	1549851	954
ERIC2_c16130		hypothetical protein	1551158	819
ERIC2_c16140	mgtE	magnesium transporter MgtE	1552034	549
ERIC2_c16141		hypothetical protein	1552769	144
ERIC2_c16160		putative hydrolase	1554135	813
ERIC2_c16170		hypothetical protein	1555260	417
ERIC2_c16180		hypothetical protein	1555731	159
ERIC2_c16190		hypothetical protein	1556212	441
ERIC2_c16191		hypothetical protein	1556857	144
ERIC2_c16200		transcriptional regulator, TetR family	1557297	900
ERIC2_c16210	yusP1	putative MFS-type transporter YusP	1558240	1617
ERIC2_c16220		DNA-binding protein	1560039	546
ERIC2_c16230	dsdA	putative D-serine dehydratase DsdA	1560737	1362
ERIC2_c16240	yqgS	lipoteichoic acid synthase-like YqgS	1562336	1887
ERIC2_c16250	arcD2	arginine/ornithine antiporter ArcD	1564376	1419
ERIC2_c16260		hypothetical protein	1566107	297
ERIC2_c16270		hypothetical protein	1566618	600
ERIC2_c16271		hypothetical protein	1567398	150
ERIC2_c16280		endo-beta-N-acetylglucosaminidase	1567759	2757
ERIC2_c16290	ptsG1	PTS system glucose-specific EIICBA component PtsG	1570635	1647
ERIC2_c16300		hypothetical protein	1572673	618
ERIC2_c16310		hypothetical protein	1573310	453
ERIC2_c16330	serS2	seryl-tRNA ligase SerS	1576069	1290
ERIC2_c16340	lysP	lysine-specific permease LysP	1578296	1443
ERIC2_c16350		inner spore coat-like protein	1579848	495
ERIC2_c16360		hypothetical protein	1580712	642
ERIC2_c16370		hypothetical protein	1581462	219
ERIC2_c16380		hypothetical protein	1582245	117
ERIC2_c16390		polysaccharide deacetylase	1582490	897
ERIC2_c16400		efflux transporter-like protein	1583573	1179
ERIC2_c16410		hypothetical protein	1584823	672
ERIC2_c16420		integral membrane protein	1585511	474
ERIC2_c16430		hypothetical protein	1586035	195
ERIC2_c16440		ABC transporter ATP-binding protein	1586230	744
ERIC2_c16450		hypothetical protein	1586970	786
ERIC2_c16470		transcriptional regulator-like protein	1589541	435
ERIC2_c16480		hypothetical protein	1589998	699
ERIC2_c16490		uridylate kinase-like protein	1590852	264
ERIC2_c16500		hypothetical protein	1591339	747
ERIC2_c16510		hypothetical protein	1592361	1290
ERIC2_c16520		hypothetical protein	1593675	228
ERIC2_c16530	phzF	phenazine biosynthesis protein PhzF	1594083	903
ERIC2_c16540		hypothetical protein	1595406	363
ERIC2_c16550		putative disulfide bond formation protein	1595811	822
ERIC2_c16560		HAD-superfamily hydrolase	1596721	834
ERIC2_c16570		acetyltransferase, GNAT family	1597745	453
ERIC2_c16600	malR	HTH-type transcriptional regulator MalR	1599581	1032
ERIC2_c16610	malX1	maltose/maltodextrin-binding protein MalX	1601012	1284
ERIC2_c16620	ganP	putative arabinogalactan oligomer transport system permease protein GanP	1602429	1263
ERIC2_c16630	ganQ	putative arabinogalactan oligomer transport system permease protein GanQ	1603688	846
ERIC2_c16640		hypothetical protein	1604599	417
ERIC2_c16650		spermine/spermidine acetyltransferase	1605215	480
ERIC2_c16660		putative nitronate monooxygenase	1605761	1074
ERIC2_c16670	hcp	hydroxylamine reductase Hcp	1607066	1281
ERIC2_c16690	murB1	UDP-N-acetylenolpyruvoylglucosamine reductase MurB	1609869	927
ERIC2_c16700		hypothetical protein	1611008	225
ERIC2_c16710		replication terminator protein	1611772	312
ERIC2_c16720	hpaB	4-hydroxyphenylacetate 3-monooxygenase, oxygenase component	1612120	1476
ERIC2_c16740		hypothetical protein	1614817	174
ERIC2_c16750	gatY2	D-tagatose-1,6-bisphosphate aldolase subunit GatY	1615102	879
ERIC2_c16760	fruA	PTS system fructose-specific EIIABC component FruA	1616038	1434
ERIC2_c16770	fruK	1-phosphofructokinase FruK	1617471	930
ERIC2_c16780		hypothetical protein	1618490	864
ERIC2_c16800		MutX-like protein	1620833	558
ERIC2_c16820		small multidrug efflux transporter-like protein	1621782	291
ERIC2_c16830		transcriptional regulator, TetR family	1622120	573
ERIC2_c16840		hypothetical protein	1622985	351
ERIC2_c16850		hypothetical protein	1623697	759
ERIC2_c16860		phage integrase family protein	1624931	216
ERIC2_c16870		putative integrase	1625187	438
ERIC2_c16920		hypothetical protein	1631463	549
ERIC2_c16921		hypothetical protein	1632023	261
ERIC2_c16930		hypothetical protein	1632656	204
ERIC2_c16940		N-acetyl-anhydromuranmyl-L-alanine amidase	1633151	1416
ERIC2_c16950		hypothetical protein	1635353	246
ERIC2_c16980		hypothetical protein	1637385	246
ERIC2_c16990		transcriptional regulator-like protein	1638127	582
ERIC2_c17000		cystine-binding periplasmic protein	1638803	867
ERIC2_c17030	glnQ3	glutamine transport ATP-binding protein GlnQ	1640371	747
ERIC2_c17040		hypothetical protein	1641162	423
ERIC2_c17050	cynS	cyanate hydratase CynS	1641869	210
ERIC2_c17060		hypothetical protein	1642327	144
ERIC2_c17070		hypothetical protein	1642516	912
ERIC2_c17080		hypothetical protein	1643633	192
ERIC2_c17110		hypothetical protein	1646193	633
ERIC2_c17130		transposase-like protein	1648019	342
ERIC2_c17140		Integrase, catalytic region	1648535	279
ERIC2_c17150		transposase IS3/IS911 family protein	1648900	321
ERIC2_c17160		transposase IS3/IS911 family protein	1649278	300
ERIC2_c17170		transcriptional regulator-like protein	1649668	600
ERIC2_c17180		hypothetical protein	1650707	369
ERIC2_c17190		hypothetical protein	1651084	768
ERIC2_c17210		hypothetical protein	1652431	555
ERIC2_c17220		hypothetical protein	1653113	219
ERIC2_c17250		formate dehydrogenase, alpha subunit	1654485	2949
ERIC2_c17260		hypothetical protein	1657436	492
ERIC2_c17270	fdhD	FdhD-like protein	1657944	804
ERIC2_c17290		iron-siderophore ABC transporter-like protein	1659993	954
ERIC2_c17310		iron-siderophore ABC transporter-like protein	1661825	918
ERIC2_c17320		hypothetical protein	1662744	168
ERIC2_c17330		hypothetical protein	1662965	258
ERIC2_c17340		6-phosphogluconolactonase-like protein	1663226	1167
ERIC2_c17350		transposase	1664479	276
ERIC2_c17360	yitW	MIP18 family protein YitW	1664949	315
ERIC2_c17370		hypothetical protein	1665422	480
ERIC2_c17380	gpmA1	2,3-bisphosphoglycerate-dependent phosphoglycerate mutase	1666058	762
ERIC2_c17390		hypothetical protein	1666872	156
ERIC2_c17400	ywaC2	GTP pyrophosphokinase YwaC	1667045	666
ERIC2_c17410		penicillinase repressor	1667856	414
ERIC2_c17420		peptidase, M56 family	1668272	816
ERIC2_c17430	bdbD	disulfide bond formation protein D	1669175	717
ERIC2_c17440		thiol-disulfide oxidoreductase-like protein	1669900	435
ERIC2_c17450		hypothetical protein	1670377	723
ERIC2_c17460		Two-component response regulator YkoH-like protein	1671543	375
ERIC2_c17470		hypothetical protein	1672120	186
ERIC2_c17480		hypothetical protein	1672357	333
ERIC2_c17490		transcriptional regulator	1672725	456
ERIC2_c17500		putative permease	1673362	834
ERIC2_c17510		hypothetical protein	1674192	396
ERIC2_c17520		hypothetical protein	1674769	1932
ERIC2_c17530	murE1	UDP-N-acetylmuramoyl-L-alanyl-D-glutamate--2, 6-diaminopimelate ligase	1676771	1518
ERIC2_c17540	femX	aminoacyltransferase FemX	1678347	1155
ERIC2_c17560	ytnA	putative amino acid permease YtnA	1681367	1368
ERIC2_c17570	nos	nitric oxide synthase oxygenase Nos	1682825	1197
ERIC2_c17590		lipoprotein-like protein	1685631	1554
ERIC2_c17610		response regulator receiver domain protein	1689011	1602
ERIC2_c17620		hypothetical protein	1691153	144
ERIC2_c17630	spoVE1	stage V sporulation protein E	1691395	1158
ERIC2_c17650		hypothetical protein	1693313	627
ERIC2_c17660	msrA	peptide methionine sulfoxide reductase MsrA	1694092	522
ERIC2_c17670	treR	trehalose operon transcriptional repressor	1695072	723
ERIC2_c17680	treP	PTS system trehalose-specific EIIBC component TreP	1696214	1434
ERIC2_c17690	treA	trehalose-6-phosphate hydrolase TreA	1697664	1683
ERIC2_c17700		hypothetical protein	1699347	174
ERIC2_c17720		hypothetical protein	1699963	363
ERIC2_c17740	gerPE	spore germination protein GerPE	1701917	423
ERIC2_c17750	sigA1	RNA polymerase sigma factor rpoD	1702425	1116
ERIC2_c17770	yhdF	putative oxidoreductase YhdF	1703982	903
ERIC2_c17780		putative membrane-associated phospholipid phosphatase	1704980	537
ERIC2_c17790	npr1	bacillolysin	1705948	1590
ERIC2_c17800		transposase	1707812	228
ERIC2_c17810	insK8	putative transposase InsK for insertion sequence element IS150	1708054	720
ERIC2_c17830	gerPC	spore germination protein GerPC	1710094	555
ERIC2_c17840		spore germination-like protein	1710711	204
ERIC2_c17850		spore germination protein GerPA/GerPF	1710931	270
ERIC2_c17860		hypothetical protein	1711283	441
ERIC2_c17880		hypothetical protein	1712058	705
ERIC2_c17890		hypothetical protein	1712759	831
ERIC2_c17900	ilvK	branched-chain-amino-acid aminotransferase 2	1713693	1071
ERIC2_c17910	bsdA	HTH-type transcriptional regulator BsdA	1714888	891
ERIC2_c17920		hypothetical protein	1716024	339
ERIC2_c17930	glsA	glutaminase GlsA	1716540	960
ERIC2_c17960		Two-component sensor histidine kinase-like protein	1719155	399
ERIC2_c17970		hypothetical protein	1719604	345
ERIC2_c17990		hypothetical protein	1721786	2004
ERIC2_c18000	mntH	putative manganese transport protein MntH	1724213	1359
ERIC2_c18030		putative Acyl-transferase domain protein	1729002	828
ERIC2_c18040		putative non-ribosomal peptide ligase/ polyketide synthase hybrid	1729922	7767
ERIC2_c18050		putative non-ribosomal peptide ligase/ polyketide synthase hybrid	1737727	9039
ERIC2_c18070		putative non-ribosomal peptide ligase domain protein	1752097	3999
ERIC2_c18080		putative non-ribosomal peptide ligase domain protein	1756142	3300
ERIC2_c18090		putative polyketide synthase subunit	1759624	4584
ERIC2_c18100		putative polyketide synthase subunit	1764208	5583
ERIC2_c18120		hypothetical protein	1778103	882
ERIC2_c18130		cyclic peptide transporter	1778995	3108
ERIC2_c18140		3-hydroxybutyryl-CoA dehydrogenase	1782134	858
ERIC2_c18150		phosphopantetheine-binding protein	1783020	270
ERIC2_c18160	nusG1	transcription antitermination protein NusG	1783304	531
ERIC2_c18170		putative non-ribosomal peptide ligase domain protein	1784181	4494
ERIC2_c18180		FkbH like protein	1788771	1053
ERIC2_c18190		hypothetical protein	1789829	252
ERIC2_c18200	yngJ	putative acyl-CoA dehydrogenase YngJ	1790083	1170
ERIC2_c18210	sbnA	putative siderophore biosynthesis protein SbnA	1791347	984
ERIC2_c18220		hypothetical protein	1792356	969
ERIC2_c18230		hypothetical protein	1793396	771
ERIC2_c18240		amidohydrolase-like protein	1794225	246
ERIC2_c18250		xylose isomerase domain-containing protein	1794792	864
ERIC2_c18290		xylose isomerase domain-containing protein	1796508	879
ERIC2_c18300		hypothetical protein	1797444	1539
ERIC2_c18310	asnO1	asparagine ligase [glutamine-hydrolyzing] 3	1799049	1863
ERIC2_c18320		transcriptional regulator	1801051	894
ERIC2_c18330		hypothetical protein	1802201	759
ERIC2_c18340	bcpB	phosphoenolpyruvate phosphomutase BcpB	1802981	900
ERIC2_c18350	bcpC	phosphonopyruvate decarboxylase BcpC	1803877	897
ERIC2_c18390		magnesium transporter-like protein	1807320	183
ERIC2_c18400		CoA-substrate-specific enzyme activase	1807568	3471
ERIC2_c18420		hypothetical protein	1813052	375
ERIC2_c18440		putative transporter	1814067	1383
ERIC2_c18450		multidrug resistance protein	1815608	1203
ERIC2_c18460		hypothetical protein	1816833	648
ERIC2_c18470		TetR family transcriptional regulator	1817587	585
ERIC2_c18490		hypothetical protein	1819786	351
ERIC2_c18500		hypothetical protein	1820139	315
ERIC2_c18520		alcohol dehydrogenase, zinc-dependent	1822049	819
ERIC2_c18530		hypothetical protein	1823006	261
ERIC2_c18540		hypothetical protein	1823311	135
ERIC2_c18550	folD1	alpha/beta hydrolase FolD	1823603	873
ERIC2_c18560		hypothetical protein	1824497	249
ERIC2_c18570		monogalactosyldiacylglycerol synthase-like protein	1824810	573
ERIC2_c18580		hypothetical protein	1825837	123
ERIC2_c18590		putative nitrite transporter NirC	1826254	843
ERIC2_c18600		hypothetical protein	1827424	216
ERIC2_c18610		hypothetical protein	1827860	204
ERIC2_c18630		hypothetical protein	1829702	468
ERIC2_c18640		hypothetical protein	1830237	813
ERIC2_c18660		hypothetical protein	1831839	804
ERIC2_c18670		putative ABC transporter	1832673	633
ERIC2_c18680		hypothetical protein	1833302	999
ERIC2_c18700		hypothetical protein	1836217	309
ERIC2_c18720	pps	putative phosphoenolpyruvate synthase Pps	1836721	2493
ERIC2_c18750		nonribosomal peptide ligase subunit	1841077	7806
ERIC2_c18780		putative malonyl CoA-acyl carrier protein transacylase	1877157	1200
ERIC2_c18800		hypothetical protein	1879449	396
ERIC2_c18810		transcriptional regulator, LysR family	1879975	900
ERIC2_c18870		type I phosphodiesterase/nucleotide pyrophosphatase	1884931	1500
ERIC2_c18880		hypothetical protein	1886514	624
ERIC2_c18890		CDF family cation diffusion facilitator	1887202	897
ERIC2_c18900		hypothetical protein	1888736	147
ERIC2_c18910		hypothetical protein	1889081	369
ERIC2_c18920	gpmA2	2,3-bisphosphoglycerate-dependent phosphoglycerate mutase	1889640	735
ERIC2_c18930		N-acetylmuramic acid deacetylase-like protein	1890430	786
ERIC2_c18940		membrane protein	1891329	1518
ERIC2_c18950		hypothetical protein	1892925	1119
ERIC2_c18960		ribonuclease inhibitor-like protein	1894516	297
ERIC2_c18970		ribonuclease	1894929	300
ERIC2_c18990		hypothetical protein	1896732	210
ERIC2_c19000		hydrolase-like protein	1897131	1431
ERIC2_c19010		NAD(FAD)-dependent dehydrogenase	1898636	1269
ERIC2_c19060		glycosyltransferase-like protein	1903488	1059
ERIC2_c19070	strD	glucose-1-phosphate thymidylyltransferase StrD	1904661	1017
ERIC2_c19090		hypothetical protein	1907685	195
ERIC2_c19100		hypothetical protein	1908015	246
ERIC2_c19110		hypothetical protein	1908332	774
ERIC2_c19160	nanE	putative N-acetylmannosamine-6-phosphate 2-epimerase NanE	1913051	681
ERIC2_c19170	ptsG2	PTS system glucose-specific EIICBA component PtsG	1913736	1533
ERIC2_c19190		glycosyltransferase-like protein	1917037	1119
ERIC2_c19200		metallophosphoesterase-like protein	1918332	828
ERIC2_c19220	gntK	gluconokinase GntK	1919607	1572
ERIC2_c19230	gnuT	gluconate permease GnuT	1921204	1368
ERIC2_c19240	gntR	gluconate operon transcriptional repressor	1922676	678
ERIC2_c19260		hypothetical protein	1924531	345
ERIC2_c19280		group-specific protein	1926801	897
ERIC2_c19290		hypothetical protein	1927766	240
ERIC2_c19300		hypothetical protein	1928494	147
ERIC2_c19340		hypothetical protein	1933469	207
ERIC2_c19350		GCN5-related N-acetyltransferase	1934053	549
ERIC2_c19360	oxdD	oxalate decarboxylase OxdD	1934835	1173
ERIC2_c19370	cwlJ	cell wall hydrolase CwlJ	1936091	429
ERIC2_c19380		hypothetical protein	1936686	390
ERIC2_c19390		magnesium transporter-like protein	1937567	210
ERIC2_c19400		hypothetical protein	1937851	231
ERIC2_c19410		hypothetical protein	1938276	264
ERIC2_c19420		hypothetical protein	1938811	267
ERIC2_c19440		hypothetical protein	1940722	507
ERIC2_c19450		hypothetical protein	1941225	207
ERIC2_c19451		hypothetical protein	1941464	438
ERIC2_c19470	yoeA	putative multidrug resistance protein YoeA	1942264	1410
ERIC2_c19480		hypothetical protein	1943766	870
ERIC2_c19490		hypothetical protein	1944859	285
ERIC2_c19520		acid phosphatase	1947146	879
ERIC2_c19530		hypothetical protein	1948278	357
ERIC2_c19540		hypothetical protein	1948715	1368
ERIC2_c19570		Two-component response regulator YclK-like protein	1953279	630
ERIC2_c19590		short-chain flavodoxin-like protein	1957055	477
ERIC2_c19600		magnesium transporter mgtE	1957723	1440
ERIC2_c19610	mgtB	magnesium-transporting ATPase, P-type 1	1959165	2649
ERIC2_c19620		hypothetical protein	1962101	234
ERIC2_c19630		hypothetical protein	1962755	348
ERIC2_c19650	lip	lipase Lip	1963584	1242
ERIC2_c19660	metE	5-methyltetrahydropteroyltriglutamate-- homocysteine methyltransferase MetE	1965078	2301
ERIC2_c19680	xerS	tyrosine recombinase XerS	1967964	1083
ERIC2_c19690		ABC transporter-like protein	1969108	1755
ERIC2_c19700		putative phosphotransferase	1971033	804
ERIC2_c19710	ccpN	transcriptional repressor CcpN	1971843	630
ERIC2_c19720	ppdK	pyruvate phosphate dikinase	1972565	2697
ERIC2_c19721		hypothetical protein	1975258	165
ERIC2_c19730		transporter, MFS superfamily	1975704	1236
ERIC2_c19740	fumA1	fumarate hydratase class I, aerobic	1977169	1530
ERIC2_c19750	pphA	phosphonopyruvate hydrolase PphA	1978785	894
ERIC2_c19760		oxidoreductase-like protein	1979699	996
ERIC2_c19770		hypothetical protein	1980716	1206
ERIC2_c19780		alanine-anticapsin ligase-like protein	1981918	1236
ERIC2_c19800		protein-tyrosine-phosphatase-like protein	1984713	483
ERIC2_c19820	dctR	putative C4-dicarboxylate response regulator DctR	1987193	966
ERIC2_c19840	dctB	C4-dicarboxylate-binding protein DctB	1989935	1059
ERIC2_c19850	dctA	C4-dicarboxylate transport protein DctA	1991251	1278
ERIC2_c19860		band 7 family protein	1992697	915
ERIC2_c19870		hypothetical protein	1993627	432
ERIC2_c19880		putative transporter	1994255	1035
ERIC2_c19900	sdaAA	putative L-serine dehydratase, alpha chain	1997174	882
ERIC2_c19910	sdaAB1	putative L-serine dehydratase, beta chain	1998082	792
ERIC2_c19920		putative non-ribosomal peptide ligase domain protein	1999213	8391
ERIC2_c19930		putative non-ribosomal peptide ligase domain protein	2007628	3243
ERIC2_c19940		serine O-acetyltransferase	2011006	201
ERIC2_c19950		hypothetical protein	2011276	180
ERIC2_c19960		hypothetical protein	2012276	210
ERIC2_c19970		hypothetical protein	2012578	282
ERIC2_c19990		hypothetical protein	2013769	186
ERIC2_c20000		hypothetical protein	2014461	900
ERIC2_c20020		phosphohydrolase	2017199	1002
ERIC2_c20050		hypothetical protein	2020048	387
ERIC2_c20060		oligopeptide transporter, OPT family	2020435	1899
ERIC2_c20070		sodium-dependent transporter	2022679	1341
ERIC2_c20080		hypothetical protein	2024365	249
ERIC2_c20090		dehydrogenase-like protein associated with rhamnogalaturonan degradation	2024790	1023
ERIC2_c20100	yvbK	putative N-acetyltransferase YvbK	2026120	474
ERIC2_c20110		hypothetical protein	2026842	642
ERIC2_c20120		hypothetical protein	2027480	159
ERIC2_c20130		putative 8-amino-7-oxononanoate synthase/2-amino-3-ketobutyrate coenzyme A ligase	2028186	1176
ERIC2_c20140	tdh	L-threonine 3-dehydrogenase Tdh	2029378	1050
ERIC2_c20150		putative 4Fe-4S ferredoxin iron-sulfur binding domain protein	2030639	234
ERIC2_c20160		hypothetical protein	2031106	201
ERIC2_c20170	aroA1	protein AroA(G)	2031360	1086
ERIC2_c20180	abrB1	transition state regulatory protein AbrB	2032629	267
ERIC2_c20190		hypothetical protein	2033050	1101
ERIC2_c20200		hypothetical protein	2034294	324
ERIC2_c20210	lytR2	transcriptional regulator LytR	2034620	1008
ERIC2_c20220	wcaJ	putative colanic biosynthesis UDP-glucose lipid carrier transferase WcaJ	2035632	1368
ERIC2_c20230		glycosyl transferase group 1	2037019	1134
ERIC2_c20240		putative transmembrane protein	2038149	1197
ERIC2_c20250		hypothetical protein	2039342	1281
ERIC2_c20270		hypothetical protein	2042077	1554
ERIC2_c20280		polysaccharide biosynthesis protein	2043656	1290
ERIC2_c20290	degT	pleiotropic regulatory protein DegT	2044942	1107
ERIC2_c20300		UDP-N-acetylglucosamine pyrophosphorylase-like protein	2046067	591
ERIC2_c20310		dehydrogenase-like protein	2046709	939
ERIC2_c20320	wecC	UDP-N-acetyl-D-mannosamine dehydrogenase WecC	2047644	1326
ERIC2_c20340		lipopolysaccharide biosynthesis protein	2049628	804
ERIC2_c20360		putative UDP-glucose 4-epimerase	2052198	963
ERIC2_c20370	oppD1	oligopeptide transport ATP-binding protein OppD	2053307	1020
ERIC2_c20380	oppF1	oligopeptide transport ATP-binding protein OppF	2054343	897
ERIC2_c20390	oppB1	oligopeptide transport system permease protein OppB	2055247	972
ERIC2_c20400	oppC1	oligopeptide transport system permease protein OppC	2056237	906
ERIC2_c20410	oppA	oligopeptide-binding protein OppA	2057157	1800
ERIC2_c20420	nrdB1	ribonucleoside-diphosphate reductase subunit beta	2059117	1032
ERIC2_c20430	nrdA1	ribonucleoside-diphosphate reductase subunit alpha	2060203	2286
ERIC2_c20470	agaS	putative tagatose-6-phosphate ketose/aldose isomerase AgaS	2064387	1194
ERIC2_c20480		transcriptional regulator, GntR family	2065625	669
ERIC2_c20500		hypothetical protein	2067676	894
ERIC2_c20510	nagJ	O-GlcNAcase NagJ	2068752	2550
ERIC2_c20520	cvrA	cell volume regulation protein A	2071736	1317
ERIC2_c20530		hypothetical protein	2073362	813
ERIC2_c20540	fumC	fumarate hydratase class II	2074316	1404
ERIC2_c20550		hypothetical protein	2075796	279
ERIC2_c20580	opuAB	glycine betaine transport system permease protein OpuAB	2077990	1728
ERIC2_c20590	opuAA	glycine betaine transport ATP-binding protein OpuAA	2079714	1200
ERIC2_c20600		transcriptional regulator-like protein	2081213	579
ERIC2_c20610	dhaS	putative aldehyde dehydrogenase DhaS	2082058	1485
ERIC2_c20620		spore autolysin-like protein	2083592	1173
ERIC2_c20630		hypothetical protein	2084780	228
ERIC2_c20650		carbohydrate kinase, YjeF related protein	2086015	846
ERIC2_c20660		glycerophosphodiester phosphodiesterase family protein	2086876	960
ERIC2_c20680	ykvY	putative dipeptidase YkvY	2089442	1104
ERIC2_c20690		Phosphate/sulfate permease	2090727	999
ERIC2_c20700		hypothetical protein	2092014	213
ERIC2_c20710		pyridine nucleotide-disulfide oxidoreductase	2092271	642
ERIC2_c20721		hypothetical protein	2093054	198
ERIC2_c20730		hypothetical protein	2093378	348
ERIC2_c20740		hypothetical protein	2093722	177
ERIC2_c20760		transposase	2095546	297
ERIC2_c20770		hypothetical protein	2096538	285
ERIC2_c20780		UspA domain-containing protein	2097024	432
ERIC2_c20790		cell envelope-like function transcriptional attenuator common domain protein	2097694	1302
ERIC2_c20810		hypothetical protein	2100880	423
ERIC2_c20820	miaB	(dimethylallyl)adenosine tRNA methylthiotransferase MiaB	2101334	1482
ERIC2_c20830	pduL2	phosphate propanoyltransferase PduL	2102947	570
ERIC2_c20840	korB	2-oxoglutarate synthase subunit KorB	2103640	858
ERIC2_c20850	korA	2-oxoglutarate synthase subunit KorA	2104494	1749
ERIC2_c20860		renal dipeptidase family protein	2106447	936
ERIC2_c20870	spoVS	stage V sporulation protein S	2107539	261
ERIC2_c20880		putative metallophosphoesterase	2107912	732
ERIC2_c20890	rny	ribonuclease Y	2108814	1632
ERIC2_c20900	recX	regulatory protein RecX	2110851	657
ERIC2_c20910	recA	protein RecA	2111606	1044
ERIC2_c20920	cinA	putative competence-damage inducible protein CinA	2112839	1257
ERIC2_c20930	pgsA	CDP-diacylglycerol--glycerol-3-phosphate 3-phosphatidyltransferase PgsA	2114225	579
ERIC2_c20940	rimO	ribosomal protein S12 methylthiotransferase RimO	2114800	1329
ERIC2_c20950		hypothetical protein	2116282	480
ERIC2_c20960		hypothetical protein	2116790	1008
ERIC2_c20970		amino acid-binding ACT domain protein	2117850	765
ERIC2_c20980		hypothetical protein	2118717	864
ERIC2_c20990		hypothetical protein	2119684	252
ERIC2_c21000		oxidoreductase, short chain dehydrogenase/reductase family protein	2120069	753
ERIC2_c21010		processing protease-like protein	2120821	1287
ERIC2_c21020		peptidase M16 domain protein	2122104	1287
ERIC2_c21030	sleB	spore cortex-lytic enzyme SleB	2123557	801
ERIC2_c21040	ftsK	DNA translocase FtsK	2124606	2406
ERIC2_c21050		YlzJ-like protein	2127200	237
ERIC2_c21060	tepA	translocation-enhancing protein TepA	2127433	747
ERIC2_c21061		hypothetical protein	2128176	96
ERIC2_c21070	rnjA	ribonuclease J 1	2128347	1677
ERIC2_c21080	dapA	dihydrodipicolinate synthase DapA	2130214	864
ERIC2_c21090	dapG	aspartokinase 1	2131105	1218
ERIC2_c21100	asd	aspartate-semialdehyde dehydrogenase Asd	2132370	1041
ERIC2_c21110	spoVFB	dipicolinate synthase, B chain	2133514	597
ERIC2_c21120	spoVFA	dipicolinate synthase, A chain	2134112	897
ERIC2_c21140		specific processing protease-like protein	2135631	1251
ERIC2_c21150		sporulation protein, polysaccharide deacetylase family	2136978	903
ERIC2_c21160		polyribonucleotide nucleotidyltransferase	2138209	2118
ERIC2_c21170	rpsO	30S ribosomal protein S15	2140553	270
ERIC2_c21180	ribC	riboflavin biosynthesis protein RibC	2140987	939
ERIC2_c21190	truB	tRNA pseudouridine synthase B	2141966	912
ERIC2_c21200		DHHA1 domain protein	2142874	999
ERIC2_c21210	rbfA	ribosome-binding factor A	2143869	357
ERIC2_c21220	infB	translation initiation factor IF-2	2144232	2424
ERIC2_c21230		ribosomal protein L7Ae	2146684	291
ERIC2_c21240		RNA binding-like protein	2147003	318
ERIC2_c21250	nusA	transcription elongation protein NusA	2147342	1098
ERIC2_c21260	rimP	ribosome maturation factor RimP	2148477	462
ERIC2_c21270	polC	DNA polymerase III polC-type	2149122	4308
ERIC2_c21280	proS	proline--tRNA ligase ProS	2153514	1446
ERIC2_c21290	rasP	zinc metalloprotease RasP	2155037	1254
ERIC2_c21300	dxr	1-deoxy-D-xylulose 5-phosphate reductoisomerase Dxr	2156628	1158
ERIC2_c21310	cdsA	phosphatidate cytidylyltransferase CdsA	2157813	789
ERIC2_c21320	uppS	undecaprenyl pyrophosphate synthase UppS	2158625	777
ERIC2_c21330	frr	ribosome-recycling factor Frr	2159473	555
ERIC2_c21340	pyrH	UMP kinase PyrH	2160031	726
ERIC2_c21350	tsf	elongation factor Ts	2160983	651
ERIC2_c21360	rpsB	30S ribosomal protein S2	2161765	699
ERIC2_c21380		hypothetical protein	2163176	555
ERIC2_c21390		hypothetical protein	2163745	354
ERIC2_c21400		hypothetical protein	2164134	1404
ERIC2_c21410		RNA polymerase sigma factor	2165564	789
ERIC2_c21420		hypothetical protein	2166368	435
ERIC2_c21430	cheD	chemoreceptor glutamine deamidase CheD	2166806	495
ERIC2_c21440	cheC	CheY-P phosphatase CheC	2167297	618
ERIC2_c21450	cheW	chemotaxis protein CheW	2167918	462
ERIC2_c21460	cheA	chemotaxis protein CheA	2168449	2061
ERIC2_c21470	cheB	chemotaxis response regulator protein-glutamate methylesterase CheB	2170594	1143
ERIC2_c21490	flhF	flagellar biosynthesis protein FlhF	2172636	1398
ERIC2_c21500	flhA	flagellar biosynthesis protein FlhA	2174030	2034
ERIC2_c21510	flhB	flagellar biosynthetic protein FlhB	2176089	1092
ERIC2_c21520	fliR	flagellar biosynthetic protein FliR	2177222	789
ERIC2_c21530	fliQ	flagellar biosynthetic protein FliQ	2178014	270
ERIC2_c21540	fliP	flagellar biosynthetic protein FliP	2178306	636
ERIC2_c21550	fliZ	FliZ-like protein	2179066	642
ERIC2_c21560	cheY	chemotaxis protein CheY	2179743	363
ERIC2_c21570	fliY	flagellar motor switch phosphatase FliY	2180133	1203
ERIC2_c21580	fliM	flagellar motor switch protein FliM	2181370	999
ERIC2_c21590	fliL	flagellar basal body-associated protein FliL	2182411	453
ERIC2_c21600		flagellar-like protein	2182863	222
ERIC2_c21610	flgG2	flagellar basal-body rod protein FlgG	2183137	813
ERIC2_c21620		hypothetical protein	2184038	390
ERIC2_c21630	flgD	flagellar hook capping protein FlgD	2184424	573
ERIC2_c21640	fliK	flagellar hook-length control protein FliK	2185032	1404
ERIC2_c21650		protein kinase PKN/PRK1, effector,flagellar motor switch protein FliG-like protein	2186471	912
ERIC2_c21660	fliJ	flagellar export protein FliJ	2187409	444
ERIC2_c21670	fliI	flagellum-specific ATP synthase FliI	2187863	1320
ERIC2_c21680	fliH	flagellar assembly protein H-like protein	2189182	819
ERIC2_c21690	fliG	flagellar motor switch protein FliG	2190002	1017
ERIC2_c21700	fliF	flagellar M-ring protein FliF	2191031	1584
ERIC2_c21710	fliE	flagellar hook-basal body complex protein FliE	2192716	315
ERIC2_c21720	flgC	flagellar basal-body rod protein FlgC	2193052	450
ERIC2_c21730	flgB	flagellar basal body rod protein FlgB-like protein	2193505	414
ERIC2_c21740	codY	GTP-sensing transcriptional pleiotropic repressor CodY	2194159	786
ERIC2_c21750	hslU	ATP-dependent protease ATPase subunit HslU	2194979	1539
ERIC2_c21760	hslV	ATP-dependent protease subunit HslV	2196543	543
ERIC2_c21770	trmFO	methylenetetrahydrofolate--tRNA-(uracil-5-)- methyltransferase TrmFO	2197264	1329
ERIC2_c21780	topA	DNA topoisomerase 1	2198605	2091
ERIC2_c21790		hypothetical protein	2200843	369
ERIC2_c21830	sucD	succinyl-CoA ligase [ADP-forming] subunit alpha	2204847	936
ERIC2_c21840	sucC	succinyl-CoA ligase [ADP-forming] subunit beta	2205839	1161
ERIC2_c21841		hypothetical protein	2207181	90
ERIC2_c21850		hypothetical protein	2207386	261
ERIC2_c21860		hypothetical protein	2207678	396
ERIC2_c21870		Mg chelatase-like protein	2208268	1545
ERIC2_c21880		hypothetical protein	2209910	405
ERIC2_c21890		flagellar biosynthesis-like protein	2210324	333
ERIC2_c21900		glycosyltransferase-like protein	2210653	1812
ERIC2_c21910	rnhB	ribonuclease HII	2212519	684
ERIC2_c21920	rbgA	ribosome biogenesis GTPase A	2213495	882
ERIC2_c21930	sipS	signal peptidase I	2214468	603
ERIC2_c21940	rplS	50S ribosomal protein L19	2215182	342
ERIC2_c21950	trmD	tRNA (guanine(37)-N(1))-methyltransferase TrmD	2215666	753
ERIC2_c21960	rimM	ribosome maturation factor RimM	2216415	522
ERIC2_c21970		RNA binding-like protein	2217162	231
ERIC2_c21980	rpsP	30S ribosomal protein S16	2217415	273
ERIC2_c21990	ffh	signal recognition particle protein Ffh	2217729	1368
ERIC2_c22000		hypothetical protein	2219126	363
ERIC2_c22010	ftsY	cell division protein, FtsY-like protein	2219622	1008
ERIC2_c22020	smc1	chromosome partition protein SMC	2220714	3579
ERIC2_c22030	rnc	ribonuclease 3	2224461	702
ERIC2_c22040	fabF3	3-oxoacyl-[acyl-carrier-protein] synthase 2	2225342	1236
ERIC2_c22050	acpP	acyl carrier protein AcpP	2226667	234
ERIC2_c22060	fabG2	3-oxoacyl-[acyl-carrier-protein] reductase FabG	2227019	741
ERIC2_c22070	fabD	malonyl CoA-acyl carrier protein transacylase FabD	2227859	936
ERIC2_c22080	fabH1	3-oxoacyl-[acyl-carrier-protein] synthase 3	2228826	987
ERIC2_c22090	plsX	phosphate acyltransferase PlsX	2229823	987
ERIC2_c22100	fapR	transcription factor FapR	2230811	594
ERIC2_c22101		hypothetical protein	2231577	174
ERIC2_c22110		hypothetical protein	2231869	513
ERIC2_c22120		hypothetical protein	2232469	1119
ERIC2_c22130	ylbJ1	sporulation integral membrane protein YlbJ	2233727	1350
ERIC2_c22140	coaD	phosphopantetheine adenylyltransferase CoaD	2235087	510
ERIC2_c22150	ylbH	putative rRNA methyltransferase YlbH	2235614	558
ERIC2_c22160		hypothetical protein	2236346	345
ERIC2_c22170		hypothetical protein	2236721	198
ERIC2_c22180		hypothetical protein	2236983	414
ERIC2_c22190		hypothetical protein	2237544	390
ERIC2_c22200		amidinotransferase family protein	2238378	279
ERIC2_c22220	gbpA2	GlcNAc-binding protein A	2239195	1332
ERIC2_c22230		hypothetical protein	2240917	243
ERIC2_c22251		hypothetical protein	2242104	129
ERIC2_c22300		hypothetical protein	2243965	318
ERIC2_c22310		hypothetical protein	2244515	285
ERIC2_c22330		hypothetical protein	2246093	516
ERIC2_c22340		hypothetical protein	2246691	315
ERIC2_c22350		hypothetical protein	2247007	216
ERIC2_c22351		hypothetical protein	2247380	111
ERIC2_c22360		hypothetical protein	2247490	225
ERIC2_c22370		LexA repressor-like protein	2247858	447
ERIC2_c22390		phage integrase-like protein	2248579	336
ERIC2_c22400		phage integrase-like protein	2248981	534
ERIC2_c22410		hypothetical protein	2250381	204
ERIC2_c22420	nfrA	FMN reductase (NAD(P)H)	2250821	741
ERIC2_c22430	rocG2	NAD-specific glutamate dehydrogenase RocG	2251712	1272
ERIC2_c22440		ATPase/histidine kinase/DNA gyrase B/HSP90 domain protein	2253118	1332
ERIC2_c22450		ABC transporter-like protein	2254860	345
ERIC2_c22451		hypothetical protein	2255258	123
ERIC2_c22460		hypothetical protein	2255377	162
ERIC2_c22470		hypothetical protein	2255607	339
ERIC2_c22480	dinB2	DNA polymerase IV 2	2255942	1248
ERIC2_c22490		hypothetical protein	2257359	201
ERIC2_c22500	arsB	arsenite resistance protein ArsB	2257745	1056
ERIC2_c22510		transcriptional regulator-like protein	2258829	348
ERIC2_c22530		transcriptional regulator-like protein	2259839	363
ERIC2_c22540	cadA	putative cadmium-transporting ATPase CadA	2260411	2133
ERIC2_c22560		NAD-dependent epimerase/dehydratase	2264125	636
ERIC2_c22570		hypothetical protein	2265043	1320
ERIC2_c22580		hypothetical protein	2266602	255
ERIC2_c22590		hypothetical protein	2267085	288
ERIC2_c22600		hypothetical protein	2267557	591
ERIC2_c22610	recG	ATP-dependent DNA helicase RecG	2268279	2046
ERIC2_c22620		EDD domain protein, DegV family	2270321	861
ERIC2_c22630		dihydroxyacetone-like protein/glyceraldehyde kinase-like protein	2271223	1761
ERIC2_c22640		hypothetical protein	2273002	360
ERIC2_c22650	rpmB	50S ribosomal protein L28	2273653	189
ERIC2_c22660	rpe	ribulose-phosphate 3-epimerase Rpe	2274650	663
ERIC2_c22670	rsgA	putative ribosome biogenesis GTPase RsgA	2275315	900
ERIC2_c22680	prkC	serine/threonine-protein kinase PrkC	2276214	2070
ERIC2_c22690	prpC	protein phosphatase PrpC	2278290	759
ERIC2_c22700	rlmN	ribosomal RNA large subunit methyltransferase N	2279068	1065
ERIC2_c22710	rsmB	ribosomal RNA small subunit methyltransferase B	2280229	1386
ERIC2_c22720	fmt	methionyl-tRNA formyltransferase Fmt	2281711	954
ERIC2_c22730	def	peptide deformylase Def	2282664	483
ERIC2_c22740	priA	primosomal protein N'	2283198	2487
ERIC2_c22750	coaBC	putative coenzyme A biosynthesis bifunctional protein CoaBC	2285684	1212
ERIC2_c22751		hypothetical protein	2286958	201
ERIC2_c22760	gmk	guanylate kinase Gmk	2287160	618
ERIC2_c22770		hypothetical protein	2287791	261
ERIC2_c22780		hypothetical protein	2288084	885
ERIC2_c22790	yitJ	bifunctional homocysteine S-methyltransferase/5,10-methylenetetrahydrofolate reductase	2289005	1899
ERIC2_c22800	dapF	diaminopimelate epimerase DapF	2291256	843
ERIC2_c22810	yloB	calcium-transporting ATPase YloB	2292219	2805
ERIC2_c22820		hypothetical protein	2295199	1788
ERIC2_c22830	gtaB	UTP--glucose-1-phosphate uridylyltransferase GtaB	2297194	873
ERIC2_c22850		LysR family transcriptional regulator	2298931	912
ERIC2_c22860		hypothetical protein	2299937	438
ERIC2_c22870		hypothetical protein	2300594	264
ERIC2_c22880		L-asparaginase II	2300916	1008
ERIC2_c22890		hypothetical protein	2301935	630
ERIC2_c22900		lipoprotein-like protein	2302620	837
ERIC2_c22901		hypothetical protein	2303591	105
ERIC2_c22910		CBS domain protein	2303835	396
ERIC2_c22920		amidohydrolase-like protein	2304238	630
ERIC2_c22940		hypothetical protein	2305388	345
ERIC2_c22950	ftsW	putative cell division protein FtsW	2305742	1167
ERIC2_c22960		hypothetical protein	2307042	387
ERIC2_c22970		calcium/proton exchanger	2307587	1044
ERIC2_c22980		hypothetical protein	2308700	285
ERIC2_c22990		phosphocarrier, HPr family	2309156	249
ERIC2_c23000		hypothetical protein	2309516	702
ERIC2_c23010		diguanylate cyclase-related-like protein	2310439	2007
ERIC2_c23020	rpsD	30S ribosomal protein S4	2312792	600
ERIC2_c23030	pbpA	penicillin-binding protein 1A	2313742	2805
ERIC2_c23040	acsA	acetyl-coenzyme A ligase AcsA	2316699	1773
ERIC2_c23050	acuA	acetoin utilization protein AcuA	2318641	639
ERIC2_c23060	acuC	acetoin utilization protein AcuC	2319311	1179
ERIC2_c23070	mtnN	MTA/SAH nucleosidase MtnN	2320597	693
ERIC2_c23080	ccpA	catabolite control protein A	2321342	1092
ERIC2_c23090		hypothetical protein	2322537	411
ERIC2_c23100		peptidase C56 family protein	2323086	534
ERIC2_c23120	gamP	putative PTS system glucosamine-specific EIICBA component GamP	2325359	1893
ERIC2_c23160		hypothetical protein	2329241	456
ERIC2_c23170		CoA binding domain protein	2329895	426
ERIC2_c23180		hypothetical protein	2330339	813
ERIC2_c23190	aroA2	3-phosphoshikimate 1-carboxyvinyltransferase AroA	2331171	1293
ERIC2_c23210	crcB2	CrcB-like protein	2332945	387
ERIC2_c23220	aroK	shikimate kinase AroK	2333435	543
ERIC2_c23230		ABC transporter-like protein	2334084	1245
ERIC2_c23240	ythP	putative ABC transporter ATP-binding protein YthP	2335325	732
ERIC2_c23250		hypothetical protein	2336057	186
ERIC2_c23300		hypothetical protein	2340271	309
ERIC2_c23310	yqjI	6-phosphogluconate dehydrogenase	2340581	1413
ERIC2_c23370		putative phage-associated protein	2346768	726
ERIC2_c23400		hypothetical protein	2349990	483
ERIC2_c23410		hypothetical protein	2350769	153
ERIC2_c23420		putative phage DNA-binding protein	2351007	945
ERIC2_c23440		hypothetical protein	2353226	405
ERIC2_c23450		AAA ATPase	2353650	1113
ERIC2_c23460		hypothetical protein	2355075	243
ERIC2_c23470		hypothetical protein	2355330	279
ERIC2_c23480		hypothetical protein	2355626	465
ERIC2_c23490		hypothetical protein	2356097	678
ERIC2_c23510		hypothetical protein	2357200	396
ERIC2_c23540		hypothetical protein	2359290	564
ERIC2_c23550		phage capsid assembly-like protein	2359864	1077
ERIC2_c23570		hypothetical protein	2361346	243
ERIC2_c23580		putative phage cell wall hydrolase	2361588	984
ERIC2_c23590		putative phage cell wall hydrolase	2362576	639
ERIC2_c23600		putative tail length tape measure protein	2363211	2007
ERIC2_c23610		hypothetical protein	2365373	171
ERIC2_c23620		phage protein	2365543	426
ERIC2_c23630		hypothetical protein	2365995	465
ERIC2_c23640		phage protein	2366461	1332
ERIC2_c23650		hypothetical protein	2367793	174
ERIC2_c23660		hypothetical protein	2367968	411
ERIC2_c23670		phage protein	2368375	411
ERIC2_c23680		hypothetical protein	2368785	360
ERIC2_c23690		hypothetical protein	2369146	303
ERIC2_c23700		hypothetical protein	2369501	234
ERIC2_c23710		putative major capsid protein	2369746	810
ERIC2_c23740		hyaluronate lyase	2372943	2403
ERIC2_c23750		putative sugar isomerase	2375358	750
ERIC2_c23760	ugl	unsaturated glucuronyl hydrolase Ugl	2376121	1173
ERIC2_c23770		putative phosphosugar isomerase/binding protein	2377307	717
ERIC2_c23780		sorbose PTS system IIB-like component	2378043	486
ERIC2_c23790	levG	PTS system, IID component	2378542	792
ERIC2_c23810		PTS system, IIA component	2380117	429
ERIC2_c23820	yvoA	HTH-type transcriptional repressor YvoA	2380560	705
ERIC2_c23830		hypothetical protein	2381459	642
ERIC2_c23840		transporter, major facilitator family protein	2382612	1284
ERIC2_c23850	speA	arginine decarboxylase SpeA	2384057	1470
ERIC2_c23860		hypothetical protein	2385631	459
ERIC2_c23870		hypothetical protein	2386164	315
ERIC2_c23880		BAAT/acyl-CoA thioester hydrolase C-terminal domain protein	2386536	1011
ERIC2_c23890		hypothetical protein	2387666	165
ERIC2_c23900		hypothetical protein	2387837	519
ERIC2_c23910		hypothetical protein	2388478	759
ERIC2_c23920		hypothetical protein	2389367	249
ERIC2_c23930	kinC	sporulation kinase C	2389772	1629
ERIC2_c23940		acetyltransferase-like protein	2391406	438
ERIC2_c23960	yuiD	acid phosphatase/vanadium-dependent haloperoxidase YuiD	2393603	453
ERIC2_c23970		CBS domain-containing protein	2394211	426
ERIC2_c23980	appA	oligopeptide-binding protein AppA	2394891	462
ERIC2_c23990	appD	oligopeptide transport ATP-binding protein AppD	2395358	807
ERIC2_c24000		oligopeptide ABC transporter, ATP-binding protein	2396262	723
ERIC2_c24001		hypothetical protein	2397148	138
ERIC2_c24010		hypothetical protein	2397455	522
ERIC2_c24020		acetyltransferase-like protein	2398051	372
ERIC2_c24040		hypothetical protein	2399943	1398
ERIC2_c24041		hypothetical protein	2401622	387
ERIC2_c24080		hypothetical protein	2406326	390
ERIC2_c24081		hypothetical protein	2406905	204
ERIC2_c24100		hypothetical protein	2409360	414
ERIC2_c24110		hypothetical protein	2410352	234
ERIC2_c24120		hypothetical protein	2410659	222
ERIC2_c24130		hypothetical protein	2411377	192
ERIC2_c24140		hypothetical protein	2411673	162
ERIC2_c24150		hypothetical protein	2411838	213
[truncated: 1,375 more rows]
